# 1 The impact of exercise training on the brain and cognition in T2DM, and 2 its physiological mediators: a systematic review

3  
4 Jitske Vandersmissen<sup>1</sup>, Ilse Dewachter<sup>2</sup>, Koen Cuypers<sup>1,3\*</sup>, Dominique Hansen<sup>1,4\*</sup>

5 1. REVAL - Rehabilitation Research Center, Faculty of Rehabilitation Sciences, Hasselt University, 3590  
6 Diepenbeek, Belgium. [Jitske.vandersmissen@uhasselt.be](mailto:Jitske.vandersmissen@uhasselt.be)

7 2. Biomedical Research Institute, BIOMED, Hasselt University, 3590 Diepenbeek, Belgium.

8 3. Movement Control and Neuroplasticity Research Group, Department of Movement Sciences, Group  
9 Biomedical Sciences, KU Leuven, 3000 Leuven, Belgium.

10 4. Heart Centre Hasselt, Jessa Hospital, 3500 Hasselt, Belgium.

11 \* Shared authorship

## 12 **Corresponding author:**

13 Jitske Vandersmissen - [Jitske.vandersmissen@uhasselt.be](mailto:Jitske.vandersmissen@uhasselt.be)

14 REVAL - Rehabilitation Research Centre, Faculty of Rehabilitation Sciences, Hasselt University  
15 Wetenschapspark 7, 3590 Diepenbeek, Belgium

## 16 **Abstract**

17 **Background:** Type 2 diabetes (T2DM) affects brain structure and function, and is associated with an  
18 increased risk of dementia and mild cognitive impairment. It is known that exercise training has a  
19 beneficial effect on cognition and the brain, at least in healthy people, but the impact of exercise  
20 training on cognition and the brain remains to be fully elucidated in patients with T2DM.

21 **Methods:** This paper systematically reviews studies that evaluate the effect of exercise training on  
22 cognition in T2DM, and aims to indicate the most beneficial exercise modality for improving or  
23 preserving cognition in this patient group. In addition, the possible physiological mediators and targets  
24 involved in these improvements are narratively described in the second part of this review. Papers  
25 published up until the end of June 2024 were searched by means of the electronic database PubMed.  
26 Studies directly investigating the effect of any kind of exercise training on the brain or cognition in  
27 patients with T2DM, or animal models thereof, were included, with the exception of human studies  
28 assessing cognition only at one time point, and studies combining exercise training with other  
29 interventions (e.g. dietary changes, cognitive training, etc.).

30 **Results:** For the systematic part of the review, 24 papers were found to be eligible. 20 out of 24 papers  
31 (83.3%) showed a significant positive effect of exercise training on cognition in T2DM, of which four  
32 studies only showed a moderate significant effect. Four papers (16.7%) did not show a significant effect  
33 of exercise on cognition in T2DM, but two of them did show a positive trend. Similar effects were found  
34 for resistance and endurance exercise, with both possibly requiring a minimal intensity to reach  
35 cognitive improvement. In addition, BDNF, lactate, leptin, adiponectin, GSK3 $\beta$ , GLP-1, the AMPK/SIRT1  
36 pathway, and the PI3K/Akt pathway were identified as plausible mediators directly from studies  
37 investigating the effect of exercise training on the brain in T2DM.

38 **Conclusion:** Overall, exercise training beneficially affects cognition and the brain in T2DM, with  
39 resistance and endurance exercise having similar effects. However, additional studies comparing the  
40 effect of different exercise intensities are needed to determine the optimal exercise intensity for  
41 cognitive improvement. Furthermore, we were able to define several mediators involved in the effect  
42 of exercise training on cognition in T2DM, but further research is necessary to unravel the entire

43 **NOTE:** This preprint reports new research that has not been certified by peer review and should not be used to guide clinical practice.

44 This review demonstrates a positive effect of exercise training on the brain in T2DM, but  
45 simultaneously emphasizes the need for additional studies on this topic. BDNF, lactate, leptin,  
46 adiponectin, GSK3 $\beta$ , GLP-1, the AMPK/SIRT1 pathway, and the PI3K/Akt pathway were identified as  
47 factors mediating the effect of exercise on the brain in T2DM.

## 48 1. Introduction

### 49 1.1 Cognitive decline in aging

50 Cognitive decline is inherent to aging. As we age, synaptic plasticity reduces, neural mitochondrial  
51 function declines, epigenetic changes occur, etc., all contributing to decreased cognitive abilities [1-5].  
52 Especially fluid intelligence, defined as the ability to solve problems, process new information, and  
53 learn new things, declines with aging. Fluid intelligence consists of several domains, including executive  
54 function, psychomotor ability, memory, and processing speed [6, 7].

55 Aging is associated with a decline in both grey and white matter volume, accompanied by ventricular  
56 enlargement and cortical thinning, as well as a decline in brain function [7, 8]. Amyloid  $\beta$  plaques are  
57 not only found in Alzheimer's disease (AD) patients, but also in 20-30% of healthy adults, and are  
58 speculated to contribute to this neuronal loss [6, 9]. Also neuronal volume and the number of neuronal  
59 connections decreases due to a decline in the complexity of dendrite arborization, decreased neuritic  
60 spines, and reduced dendrite length [6, 10]. In addition, demyelination and decreased white matter  
61 integrity contribute to functional impairment of the brain [8].

### 62 1.2 Cognitive dysfunction in T2DM

63 T2DM patients are prone to more severe cognitive decline than what occurs during normal aging. A  
64 large fraction (45%) of T2DM patients experience cognitive dysfunction and have an increased risk of  
65 dementia [11-16]. Subjects with diabetes have a relative risk of 1.46 for AD, and a relative risk of 1.51  
66 for any form of dementia [17]. Especially executive functioning, memory, attention, and information  
67 processing speed have been shown to be affected in T2DM [14, 18, 19]. This cognitive impairment is  
68 related to the affected brain structure and metabolism in T2DM. Decreased regional grey matter  
69 volume as well as altered intrinsic activity in the default mode network have been demonstrated in  
70 these patients [20-22]. Multiple pathophysiologies have been suggested as the cause of this, including  
71 cardiovascular complications, chronic low-grade inflammation, and hyperglycemia [14, 15, 18].

72 Several studies have demonstrated a link between T2DM and AD, also called type 3 diabetes. These  
73 studies focus on the fact that insulin signalling also plays an important role in the brain, and that T2DM  
74 and AD seem to share a number of pathophysiological processes such as amyloid  $\beta$  plaques, disturbed  
75 cerebral glucose metabolism, tau hyperphosphorylation, and inflammation [18, 23-26]. Insulin and  
76 insulin-like-growth-factor (IGF)-1 are important for neuronal survival and brain function. Numerous  
77 insulin receptors (IR) and IGF-1 receptors (IGF-1R) can be found in the brain, with a large amount being  
78 present in the hippocampus. One of the major downstream pathways of the IR is the PI3K/Akt  
79 pathway, which plays an important role in the regulation of brain function, and in the inactivation of  
80 GSK3 $\beta$ , which is an enzyme able to phosphorylate tau at pathological tau epitopes [23, 27, 28].  
81 Reduced cerebral IR activation and insulin levels have been demonstrated in AD [25, 29], highlighting  
82 similar processes in AD and T2DM. Moreover, insulin-degrading enzyme is capable of clearing amyloid  
83  $\beta$  peptides that aggregate into amyloid plaques, a key pathological hallmark of AD. In T2DM,  
84 competitive binding of high insulin concentrations and amyloid  $\beta$  peptides with this enzyme could be  
85 involved in decreased amyloid  $\beta$  clearance, thereby potentially contributing to increased accumulation  
86 of amyloid  $\beta$  peptides, and formation of amyloid  $\beta$  plaques [15, 30, 31].

### 87 1.3 Positive effect of exercise on cognitive function

88 In healthy people, exercise has a positive effect on cognitive function [32-34]. This effect is mediated  
89 by multiple processes. Muscle contraction during exercise releases myokines, which stimulate the  
90 production of neurotrophic factors such as brain-derived neurotrophic factor (BDNF), promoting

91 neurogenesis. Additionally, the exercise-induced release of anti-inflammatory factors contributes to  
92 balancing the brain's redox status, counteracting many pathological processes [35-38]. Research shows  
93 that exercise reduces the age-related decrease in hippocampal volume [39-41], which, in combination  
94 with increased levels of neurotrophic factors, contributes to the maintenance of memory and  
95 neuroplasticity [36, 42, 43]. Moreover, there is a positive association between cardiorespiratory fitness  
96 levels and whole-brain and white matter volume in patients with early-stage AD [44]. In this way,  
97 exercise reduces the risk of dementia and neurodegenerative diseases [36, 45-47].

98 Lactate has been identified as an important contributor to the positive effect of exercise on cognitive  
99 function. During anaerobic exercise, lactate is released from contracting muscles, eventually leading  
100 to increased lactate levels in the brain after crossing the blood-brain-barrier (BBB). This results in an  
101 increased expression of brain plasticity genes such as BDNF, Arc, and c-fos, contributing to  
102 neurogenesis [48-50]. In addition, lactate also binds to hydroxycarboxylic acid receptor 1 (HCAR1),  
103 which leads to an increase in vascular endothelial growth factor (VEGF), stimulating angiogenesis and  
104 thereby contributing to increased cognitive function [50-52]. Also the myokine irisin has been shown  
105 to positively influence cognition. Synaptic plasticity and memory in amyloid pathology mimicking AD  
106 mouse models can be rescued by boosting brain levels of FNDC5/irisin, and peripheral overexpression  
107 of FNDC5/irisin rescues memory impairment [53]. Cathepsin b is another myokine which has been  
108 associated with improved cognition. It is known to play a role in both neurogenesis and angiogenesis  
109 [54, 55]. Cathepsin b levels increase in mouse and human plasma in response to exercise, which is  
110 positively correlated with memory, while cathepsin b-knockout mice do not show any cognitive  
111 improvements following running exercise [56]. This suggests that cathepsin b is mandatory for the  
112 positive effect of exercise on cognition.

#### 113 *1.4 The association of physical activity with cognitive function in T2DM*

114 Because of the above-mentioned positive effects of exercise on cognitive function, and to get more  
115 insight into whether this translates to T2DM, some studies have explored the association between  
116 physical activity (PA) and cognition in T2DM.

117 For example, one study found significantly higher cognitive scores in an active group of T2DM patients  
118 compared to a sedentary group of T2DM patients [57]. They also found a significant negative  
119 correlation ( $r = -0.2$ ,  $P = 0.03$ ) between cognition and BMI in the sedentary group, and a significant  
120 positive correlation ( $r = 0.55$ ,  $P = 0.01$ ) between cognition and minutes of weekly exercise in the active  
121 group. Another study found that active elderly T2DM patients had a significantly slower rate of  
122 cognitive decline compared to non-active/sedentary elderly T2DM patients, more specifically in the  
123 global cognition ( $p = 0.005$ ), executive functioning ( $p = 0.014$ ), and attention/working memory ( $p =$   
124  $0.01$ ) domains [58]. These findings were confirmed by multiple other studies [59-61].

125 In a study investigating the influence of the BDNF Val66Met polymorphism on the association between  
126 cognition and PA in diabetic patients, it was found that carriers of the Met-allele showed significantly  
127 higher scores of words recall ( $p < 0.001$ ), mental status ( $p = 0.004$ ), and total cognition, ( $p = 0.04$ ), and  
128 had a significantly higher education level. Overall, PA was associated with better total cognition, words  
129 recall, and mental status, no matter the intensity. This association was strongest in the Met/Met carrier  
130 group, and stronger for females than for males within this group. They also found that light to  
131 moderate PA showed greater association with cognitive domains than moderate to vigorous PA. These  
132 findings thus suggest that female Met/Met diabetic carriers cognitively benefit the most from PA, and  
133 that light to moderate PA has the most influence on the brain [61].

134 Another study examined the individual and joint influence of diabetes status, apolipoprotein E (APOE)  
135  $\epsilon 4$ , and PA on the risk of dementia and cognitive impairment without dementia (CIND) in cognitively

136 normal older adults. The risk of dementia and CIND was higher in diabetic patients and APOE  $\epsilon$ 4 carriers  
137 who reported low levels of moderate to vigorous PA. The risk was even found to be nearly 10-fold  
138 higher for physically inactive diabetic APOE  $\epsilon$ 4 carriers. Higher levels of PA were associated with lower  
139 dementia/CIND risk [60].

140 Overall, these findings suggest that higher levels of PA are associated with better cognitive function  
141 and less cognitive decline in T2DM. However, based on these studies alone, one cannot assume  
142 causality. In addition, there is a possibility of reverse causality, where reduced cognitive function  
143 contributes to lower levels of PA. Therefore, several studies have investigated the acute effect of  
144 exercise on cognitive function in T2DM.

### 145 *1.5 The acute effect of exercise on cognitive function in T2DM*

146 The acute effect of exercise on cognition in T2DM has mainly been investigated in the domain of  
147 executive function.

148 One study found that both endurance and resistance training acutely improved inhibitory control and  
149 response time in T2DM patients [62]. In addition, moderate-intensity integrated concurrent exercise  
150 (ICE), consisting of both endurance and resistance training, acutely improved all three aspects of  
151 executive function (inhibition, conversion and refresh function) in cognitively normal hospitalised  
152 T2DM patients, while resistance exercise improved inhibition, and endurance exercise only caused  
153 significant improvements in the refresh function. The ICE-induced improvements in executive function  
154 were accompanied by a simultaneous increase in cerebral blood flow in the dorsolateral prefrontal  
155 cortex (DLPFC), the frontal pursuit area (FPA), and the orbitofrontal cortex (OFC), while resistance  
156 exercise showed a corresponding activation of DLPFC and FPA, and endurance exercise increased  
157 cerebral perfusion in the FPA, OFC and Broca region [63]. These results suggest that an exercise-  
158 induced increase in cerebral blood flow in certain areas can elicit specific cognitive improvements. This  
159 knowledge can be used to customise exercise programs in T2DM patients in order to obtain the desired  
160 effect.

161 These studies already give some insight into the effect of exercise on cognition in T2DM. However,  
162 with the aim to incorporate exercise in T2DM treatment for cognitive improvement, it is necessary to  
163 know the effect of *long-term exercise training* on the brain, which can be different from the acute  
164 effect. Therefore, this review will focus on pre-post intervention studies. This review only describes  
165 RCTs investigating the effect of exercise training on cognition and brain structure in T2DM and animal  
166 models thereof, with special emphasis on the mediators and targets involved in this. So far, this is the  
167 first review of this kind. The knowledge provided by this review could more reliably provide insights in  
168 the mechanisms of cognitive decline and cognitive improvement in T2DM, and could be used to design  
169 more specific exercise programs to target the brain in T2DM patients.

## 170 **2. Methods**

171 This review consists of two parts, the first of which is a systematic review of the papers investigating  
172 the effect of exercise training on cognition in T2DM. The second part narratively describes studies that  
173 show beneficial brain changes or brain changes in combination with cognitive improvement in T2DM  
174 as a result of exercise training, and aims to identify the involved mediators by pooling studies with  
175 similar findings.

### 176 *2.1 Search methods*

177 The papers described in the systematic part of this review were found by entering the following search  
178 string into PubMed: (exercise OR "physical activity" OR "aerobic exercise" OR "aerobic training" OR

179 "resistance exercise" OR "resistance training" OR "combined exercise" OR "combined training" OR  
 180 "endurance exercise" OR "endurance training") AND (T2DM OR diabetes OR "type 2 diabetes") AND  
 181 (memory OR "executive function\*" OR "processing speed" OR attention OR brain OR cognition OR  
 182 "cognitive function"). The filters "randomised controlled trial" and "clinical trial" were applied.  
 183 Relevant related articles suggested by PubMed when accessing articles found by entering the  
 184 aforementioned search string were also considered. Reference lists of reviews in line with the present  
 185 one [64-72] were examined as well. The current review discusses articles published up until the end of  
 186 June 2024. Duplicate articles and studies of poor quality were removed (Fig. 1). For the narrative part  
 187 of the review, only studies directly investigating the effect of exercise on the brain in T2DM were  
 188 considered to identify plausible mediators and pathways.

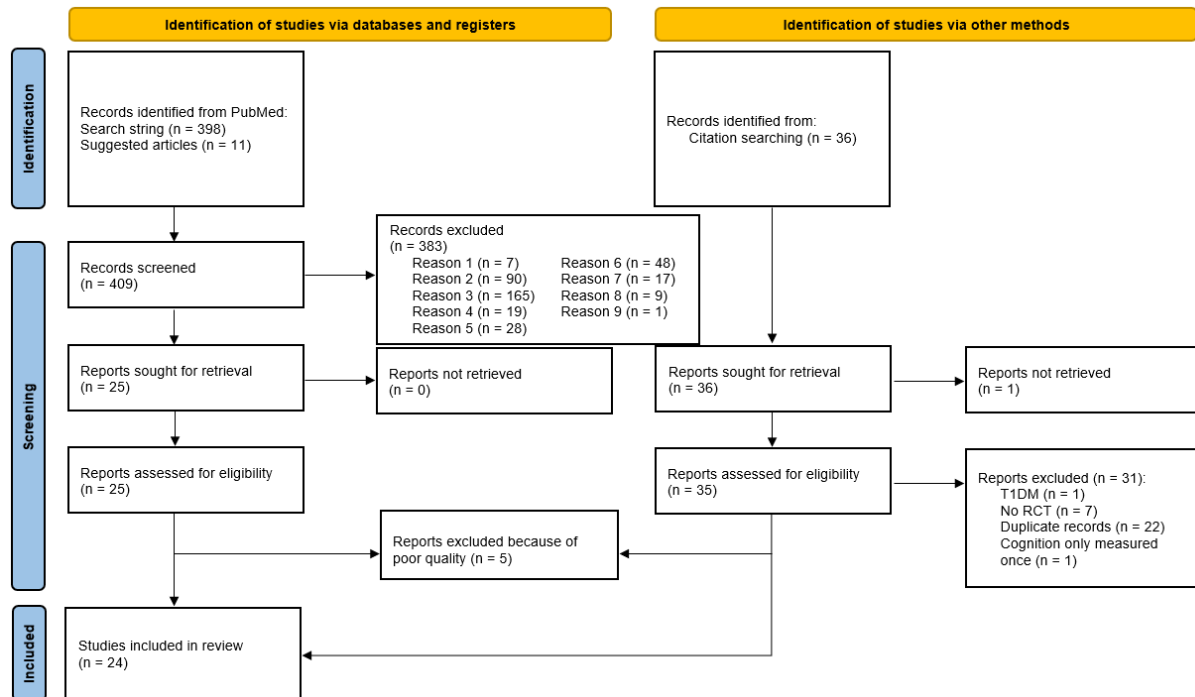

189  
 190 **Fig. 1 Prisma flow chart of study selection procedure.** Reason 1: Does not investigate the effect of exercise training; Reason  
 191 2: Does not investigate the effect of exercise training on cognition; Reason 3: Does not investigate the effect of exercise  
 192 training on cognition in T2DM; Reason 4: Not conducted in T2DM; Reason 5: Does not investigate the effect on cognition;  
 193 Reason 6: Does not investigate the effect on cognition in T2DM; Reason 7: Does not investigate the effect of exercise training  
 194 in T2DM; Reason 8: Does not investigate the effect of exercise training on its own (diet, cognitive training, ...); Reason 9: Article  
 195 not available in English. RCT = randomised controlled trial; T1DM = type 1 diabetes. From: Page MJ, McKenzie JE, Bossuyt PM,  
 196 Boutron I, Hoffmann TC, Mulrow CD, et al. The PRISMA 2020 statement: an updated guideline for reporting systematic reviews.  
 197 *BMJ* 2021;372:n71. doi: 10.1136/bmj.n71.

## 198 2.2 Eligibility

199 The PICO (population, intervention, comparison, outcome) method was used to determine whether  
 200 articles were eligible for inclusion in this review. In order to be included in the systematic part of this  
 201 review, the articles had to be written in English, and had to investigate the effect of any kind of exercise  
 202 training on cognition in T2DM patients or T2DM animal models. Articles discussing only type 1 diabetes  
 203 were excluded, as well as articles only investigating depression, anxiety, or other mental disorders in  
 204 T2DM. Also studies investigating the effect of exercise training in combination with another  
 205 intervention (e.g. dietary changes, cognitive training, etc.) were excluded. Studies in which cognitive  
 206 function was only assessed at one time point in human subjects were excluded since these make it  
 207 impossible to accurately assess the effect of exercise training on cognition (pre- and post-intervention  
 208 assessments mandatory).



209 **2.3 Quality control**

210 Quality control of the included human studies was conducted by means of the PEDro scale, which  
 211 assesses internal validity [73]. With this tool, a maximal score of 10 can be reached, indicating optimal  
 212 methodological quality. However, it was impossible for the majority of the studies included in this  
 213 review to reach a maximal score of 10, since in exercise interventions it is not feasible to blind the  
 214 participants and the therapists who administered the therapy. Because of this, a score of >4/10 instead  
 215 of >6/10 was required for inclusion. Quality of the animal studies was assessed by means of the  
 216 Collaborative Approach to Meta-Analysis and Review of Animal Data from Experimental Studies  
 217 (CAMARADES) checklist [74]. Animal studies with a score of <6/10 were excluded. If nothing was  
 218 mentioned about the criterion, it was indicated as not fulfilled.

219 **Table 1 PEDro characteristics of included human studies**

|                                         | 1 | 2 | 3 | 4 | 5 | 6 | 7 | 8 | 9 | 10 | 11 | Total |
|-----------------------------------------|---|---|---|---|---|---|---|---|---|----|----|-------|
| <i>Leischik et al. (2021)</i>           | √ | √ | √ | √ | X | X | X | √ | √ | √  | √  | 7/10  |
| <i>Anderson-Hanley et al. (2012)</i>    | √ | √ | X | √ | X | X | X | X | √ | √  | √  | 5/10  |
| <i>Ploydang et al. (2023)</i>           | √ | √ | X | √ | X | X | X | √ | √ | √  | √  | 6/10  |
| <i>Wang et al. (2023)</i>               | √ | √ | √ | √ | X | X | √ | X | √ | √  | √  | 7/10  |
| <i>Zhao et al. (2022)</i>               | √ | √ | √ | X | √ | √ | √ | √ | √ | √  | √  | 9/10  |
| <i>Yamamoto et al. (2021)</i>           | √ | √ | X | √ | X | X | X | √ | √ | √  | √  | 6/10  |
| <i>Teixeira et al. (2019)</i>           | √ | √ | X | √ | X | X | X | √ | √ | X  | √  | 5/10  |
| <i>Silveira-Rodrigues et al. (2021)</i> | √ | X | X | √ | X | X | X | √ | √ | √  | √  | 5/10  |
| <i>Espeland et al. (2017)</i>           | √ | √ | X | √ | X | √ | √ | √ | √ | √  | √  | 8/10  |
| <i>Silveira-Rodrigues et al. (2023)</i> | √ | X | X | √ | X | X | X | √ | √ | √  | √  | 5/10  |
| <i>Ghodrati et al. (2023)</i>           | √ | √ | X | √ | X | X | X | √ | √ | √  | √  | 6/10  |
| <i>Martinez-Velilla et al. (2021)</i>   | √ | √ | X | √ | X | X | √ | √ | √ | √  | √  | 7/10  |
| <i>Callisaya et al. (2017)</i>          | √ | √ | √ | √ | √ | X | √ | √ | √ | √  | √  | 8/10  |
| <i>Ghahfarrokhi et al. (2024)</i>       | √ | √ | √ | √ | X | X | √ | √ | √ | √  | √  | 8/10  |
| <i>Shellington et al. (2018)</i>        | √ | √ | √ | √ | X | X | X | X | √ | √  | √  | 5/10  |
| <i>Chen et al. (2023)</i>               | √ | √ | X | √ | X | X | √ | √ | √ | √  | √  | 7/10  |
| <i>Cai et al. (2019)</i>                | √ | X | X | √ | X | X | X | √ | √ | √  | √  | 5/10  |
| <i>Coelho Junior et al. (2018)</i>      | √ | X | X | √ | X | X | X | √ | √ | √  | √  | 5/10  |

221 *v = fulfilled, X = not fulfilled, 1 = Eligibility criteria specified, 2 = Randomisation, 3 = Allocation concealed, 4 = Groups similar*  
 222 *at baseline, 5 = Blinding of subjects, 6 = blinding of therapists, 7 = Blinding of assessors, 8 = Measures obtained for more*  
 223 *than 85% of initial subjects, 9 = Intention-to-treat analysis, 10 = Between-group statistical comparisons, 11 = point measures*  
 224 *and measures of variability*

225 **Table 2 CAMARADES characteristics of included animal studies**

|                                  | 1 | 2 | 3 | 4 | 5 | 6 | 7 | 8 | 9 | 10 | Total |
|----------------------------------|---|---|---|---|---|---|---|---|---|----|-------|
| <i>Parsa et al. (2021)</i>       | √ | √ | √ | X | √ | √ | √ | X | √ | √  | 8/10  |
| <i>Shekarchian et al. (2023)</i> | √ | √ | √ | X | X | √ | √ | X | X | √  | 6/10  |
| <i>Jesmin et al. (2022)</i>      | √ | √ | √ | X | X | √ | √ | X | X | √  | 6/10  |
| <i>Lang et al. (2020)</i>        | √ | √ | √ | √ | √ | √ | √ | X | √ | √  | 9/10  |
| <i>Shima et al. (2017)</i>       | √ | √ | √ | X | X | √ | √ | X | √ | √  | 7/10  |
| <i>Shima et al. (2023)</i>       | √ | √ | X | X | X | √ | √ | X | √ | √  | 6/10  |

226 *v = fulfilled, X = not fulfilled, 1 = Published in peer-reviewed journal, 2 = Control of temperature, 3 = Randomisation, 4 =*  
 227 *Allocation concealed, 5 = Blinding of assessors, 6 = No anaesthetics with marked intrinsic properties, 7 = Use of animals with*  
 228 *diabetes, 8 = Sample size calculation, 9 = Compliance with regulatory requirements, 10 = Statement regarding conflict of*  
 229 *interest*  
 230

### 231 3. Results

#### 232 3.1 Systematic review on the effect of exercise training on cognition in T2DM

##### 233 3.1.1 Endurance exercise training

###### 234 *Human studies*

237 Endurance exercise as simple as walking can already significantly improve cognition in T2DM patients.  
 238 In a study by Leischik et al. (2021), T2DM patients were randomised into a walking group, pedometer  
 239 group or control group. The walking group had to walk for 40 min, 3 times a week. The pedometer  
 240 group had to reach 10 000 steps per day. Both the walking group and the pedometer group, the latter  
 241 of which managed to reach an average of 8700 steps per day, showed significant improvements in  
 242 attention and non-verbal memory. Verbal memory also significantly improved in the walking group  
 243 [75]. Besides normal walking, also aquatic Nordic walking performed for 60 min 3 times a week for 12  
 244 weeks, has proven to cause significantly increased Montreal Cognitive Assessment (MoCA) scores in  
 245 T2DM patients. However, no significant improvements were seen in the MMSE, trail making test part  
 246 B, or Stroop colour and word test [76].

247  
 248 Multiple other studies have demonstrated the positive effect of endurance exercise training on  
 249 cognition in T2DM. One study found that 6 months of endurance exercise significantly improves  
 250 executive function in older adults with glucose intolerance, including prediabetic and newly diagnosed  
 251 diabetic patients. Memory, however, showed no significant improvements [77]. Another study  
 252 investigated the relationship between 3 months of endurance exercise and executive function in 10  
 253 T2DM patients and 10 age-matched controls. Executive function was tested at three different time  
 254 points: a pre-test to familiarise the participants with the tests, and to avoid practice effects in the post-  
 255 exercise test, a pre-exercise test one month after the pre-test, and a post-exercise test. Differences  
 256 between the pre-exercise and post-exercise test were assessed. A significantly improved performance  
 257 was observed in the diabetic group for the Colour Trails 2 test, in which the participants needed to  
 258 connect numbered dots in numerical order while alternating the colour of the dots. The time to



259 complete the task decreased from 117 seconds to 92 seconds in the diabetic group, as opposed to a  
260 non-significant decrease from 103 seconds to 99 seconds in the healthy control group. No significant  
261 improvements were found for the Digit Span Backwards or Stroop C tests [78]. Additionally, in a study  
262 by Wang et al. (2023), the effect of endurance training on hippocampal volume and cognition was  
263 tested in 82 T2DM patients. The patients were divided into a control group and a training group. After  
264 one year of endurance training, they found significantly increased MMSE and MoCA scores in the  
265 training group compared to the control group, suggesting that endurance exercise can improve  
266 cognitive function in T2DM [79].

### 267 268 *Animal studies*

269  
270 Also animal studies show a predominantly positive effect of endurance exercise training on cognition.  
271 Shekarchian et al. (2023) found that streptozotocin- and high fat diet-induced diabetic C57BL/6 J mice  
272 that received 4 weeks of swimming training scored significantly better on tests for working, spatial,  
273 and recognition memory compared to non-exercising diabetic mice [80]. Another study showed that  
274 swimming training for 12 weeks in streptozotocin-nicotinamide-induced type 2 diabetic rats improved  
275 exploratory behaviour, locomotor activity, passive avoidance memory, and non-spatial cognitive  
276 memory compared to their sedentary counterparts. However, this improvement was found to be  
277 insignificant [81].

278  
279 The Morris water maze test has oftentimes been used to demonstrate the effect of endurance exercise  
280 on cognition in animal models of T2DM. In this test, the animal is placed in a circular swimming pool  
281 where a platform is hidden somewhere under the water surface. After a few practice rounds, the time  
282 it takes the animal to find the platform, and the length of the path that is followed, are measured.  
283 These measures give an indication of spatial learning and memory [82]. For example, one study looked  
284 into the effect of 4 months of both light and moderate intensity treadmill running on memory in pre-  
285 symptomatic Otsuka-Long-Evans-Tokushima fatty (OLETF) rats. Before the exercise intervention, the  
286 OLETF rats spent considerably less time in the quadrant area where the platform was located during  
287 the learning phase, compared to control Long-Evans Tokushima (LETO) rats. After the intervention,  
288 both exercise intensities showed to have improved memory function in the OLETF rats, since both  
289 escape latency and swim length were shortened [83]. Lang et al. (2020) also used the Morris water  
290 maze test to test the effect of 8 weeks of moderate-intensity treadmill exercise on memory in T2DM  
291 mice. The exercising T2DM mice showed a significantly reduced escape latency on day 4-5 compared  
292 to the non-exercising T2DM mice, and their number of platform crossings significantly increased over  
293 time [84]. Another similar study was performed where the effect of 4 weeks of moderate-intensity  
294 treadmill running in OLETF rats was investigated. They found that both swim path length and escape  
295 latency of the exercising OLETF rats were reduced at trials on days 2-4, and that their time spent in the  
296 platform area significantly improved after the exercise intervention [85]. Another study by Shima et al.  
297 (2023) assessed the effect of 4 weeks of light-intensity running on a forced exercise wheel bed in ob/ob  
298 mice. However, here they did not find an effect of exercise on the swim distance, escape latency, or  
299 speed. They did find that the times of crossing the target platform during the probe test in the  
300 exercised ob/ob mice did not differ significantly from that in the control C57BL/6 mice, and that it was  
301 greater than in the sedentary ob/ob mice, but not significantly [86].

302  
303 Based on these studies, endurance exercise conducted for 40-60 min, 3-5 times per week enables  
304 cognitive improvements in T2DM patients. Especially memory shows to be sensitive to endurance  
305 exercise-induced improvement. However, two out of five human studies discussed here only found  
306 significant improvements in MoCA and/or MMSE scores. Since the MMSE and MoCA were designed as  
307 screening tools to diagnose mild cognitive impairment (MCI) [87, 88], they cannot be considered very  
308 reliable for detecting changes in cognitive function.

### 309 310 3.1.2 Resistance exercise training

311  
312  
313  
314  
315  
316  
317  
318  
319  
320  
321  
322  
323  
324  
325  
326  
327  
328  
329  
330  
331  
332  
333  
334  
335  
336  
337  
338  
339  
340  
341  
342  
343  
344  
345  
346  
347  
348  
349  
350  
351  
352  
353  
354  
355  
356  
357  
358  
359  
360  
361  
362

### *Human studies*

The beneficial effect of resistance exercise on cognition in T2DM patients was shown by Zhao et al. (2022). They examined the effect of 12 months of power training on executive function, attention/speed, memory, and global cognition in older adults with T2DM, and aimed to determine whether there is an association between cognitive improvements and improvements in muscle strength, body composition, and/or endurance. 103 patients were divided into a power training group or a sham low-intensity group that performed the same exercises as the power training group, but without added weight. Cognition of both groups improved over time, with increased scores in the Trails A, Trails B, word list recall, and word list memory. In addition, improved memory was associated with both increased skeletal muscle mass and reduced body fat mass, and improvement in Trails B minus A in the power training group was associated with increases in knee extension strength [89]. Yamamoto et al. (2021) failed to find similar results. In their study, 60 T2DM patients aged  $72.9 \pm 2.4$  years were divided into a control group, a resistance training group, and a resistance training group with leucine (an amino acid promoting muscle synthesis) supplementation. The training groups performed daily bodyweight resistance exercises and exercises with elastic bands every day at home, for a total period of 48 weeks. Cognitive function was assessed by means of the MMSE at baseline and after the intervention period. The MMSE score in the control group was significantly decreased to  $27.5 \pm 2.6$  after 48 weeks, while the score in the training groups had not significantly changed. This caused the MMSE score at 48 weeks to be significantly higher in the training groups than in the control group [90].

Although both studies suggest a positive effect of resistance exercise training on cognition in T2DM, a sufficient number of studies to draw a definite conclusion is lacking. Moreover, one study only assessed cognitive function by means of the MMSE, limiting the information on cognitive function, and thus the reliability of the results.

#### 3.1.3 Endurance vs. resistance exercise training

### *Human studies*

To determine the exercise modality most effective in improving cognition in T2DM, some studies compared the effect of endurance and resistance exercise training. Teixeira et al. (2029) investigated the effect of either endurance or resistance exercise on cognitive function in T2DM patients or patients with arterial hypertension. The patients were randomised into a resistance exercise group or an endurance exercise group. Both groups exercised at moderate intensity for 12 weeks. Cognitive function was assessed before and after the intervention by means of the mental test and training system (MTTS), consisting of the cognitrone (attention and concentration), the determination test (reaction time), and the visual pursuit test (selective attention). The group with both T2DM and hypertension, but not the group with only hypertension, showed a significantly improved performance in the cognitrone, but no significantly improved reaction time. No differences were observed between the endurance and resistance exercise group. These results show that both endurance and resistance exercise are capable of increasing attention and concentration in T2DM patients with arterial hypertension [91].

This study shows that endurance and resistance exercise training have a comparable positive effect on cognitive function in T2DM, however, additional evidence confirming these results is needed.

#### 3.1.4 Combined endurance and resistance exercise training

### *Human studies*

363 Several studies have explored the effect of combined exercise training, consisting of both resistance  
364 and endurance exercise, sometimes in combination with flexibility or balance exercises, on cognition  
365 in T2DM patients. One study found significantly improved inhibitory control, working memory,  
366 cognitive flexibility, and attention after 8 weeks of combined exercise training in T2DM patients,  
367 compared to a control group [92]. The same research team also examined the effect of 8 weeks of  
368 combined exercise on plasma BDNF levels, executive function and long-term memory in T2DM  
369 patients. They observed significantly improved executive function following the combined exercise,  
370 while BDNF levels were not found to be significantly changed [93]. Espeland et al. (2027) conducted  
371 an exploratory analysis of data from the Lifestyle Interventions and Independence for Elders (LIFE) trial,  
372 which was a randomised controlled clinical trial of exercise intervention consisting of walking,  
373 resistance training, and flexibility exercises in sedentary non-demented T2DM patients and healthy  
374 subjects. Cognitive function was tested at baseline and 2 years after randomisation. They found that  
375 cognitive function, more specifically global cognitive function and delayed memory, significantly  
376 improved in the diabetic participants of the intervention group only, suggesting a beneficial effect of  
377 combined training on cognition in T2DM [94]. Additionally, one study determined the effect of 12  
378 weeks of combined exercise training, consisting of endurance, resistance, and balance exercises, on  
379 cognition in women with T2DM. Cognition was tested by means of the MoCA, the digit symbol  
380 substitution test, and the forward digit span test. After the 12-week intervention, the exercise group  
381 scored significantly higher on the MoCA compared to the control group, and, with an increase of 3.1,  
382 improved significantly compared to baseline. However, neither of the groups showed improvement in  
383 the other tests [95].

384  
385 In a study by Martinez-Velilla et al. (2021), 103 acutely hospitalised elderly T2DM patients were  
386 randomised to an exercise group or a control group. Cognitive function was assessed by means of the  
387 MMSE at baseline and at discharge. The exercise intervention consisted of a combination of resistance,  
388 balance, and walking exercises. The median length of stay, and thus of the intervention, was 8 days.  
389 There was no difference in MMSE score between both groups at baseline. However, after the  
390 intervention, the exercise group scored on average 1.6 points higher than the control group (23.7 vs.  
391 22.1), which was found to be significant [96]. In addition, a pilot study looked into the effect of 6  
392 months of a progressive endurance- and resistance-training program on the brain and cognition in  
393 T2DM. 50 T2DM patients were randomised into an intervention group and a control group. The  
394 intervention group performed 6 months of endurance and progressive resistance training. The control  
395 group received upper and lower limb stretching of light intensity and a gentle movement program,  
396 which were performed in the same volume, frequency and setting as in the intervention group. The  
397 intervention group showed improved hippocampal and total brain volumes, improved white matter  
398 integrity, and less decline in white matter volume. They also showed a better global cognitive score,  
399 and better performance on the Digit Symbol Coding Test, Rey Complex Copy test, Stroop C-D, Trail  
400 Making Test A and B, Hopkins verbal learning test (intermediate and recognition scores), and  
401 Controlled Oral Word Association Test compared to the control group [97]. Another pilot study  
402 examined the effect of 6 weeks of high-intensity low-volume (HIFT) vs. low-intensity high-volume (LIFT)  
403 functional training on cognition in cognitively impaired elderly T2DM patients. The HIFT group  
404 exercised three times a week at 100-120% of the lactate threshold, while the LIFT group exercised five  
405 times a week at 70-75% of the lactate threshold. The MMSE was used to diagnose cognitive  
406 impairment (MMSE  $\leq$  23). Processing speed, learning, memory, and attention were assessed by means  
407 of the Symbol Digit Modalities Test (SDMT), California Verbal Learning Test Second Edition (CVLT-II),  
408 Brief Visuospatial Memory Test-Revised (BVRT), and Stroop tests respectively. After the  
409 intervention, MMSE, Stroop, SDMT, CVLT-II and BVRT scores had improved significantly in the HIFT  
410 group, while only MMSE and Stroop scores, had improved significantly in the LIFT group. However, the  
411 only cognitive score change that was significantly different from the control group that did not receive  
412 an exercise intervention, was the change in Stroop scores in the HIFT group [98].  
413

414 Overall, most studies suggest a positive effect of combined exercise training on cognitive function in  
415 T2DM. However, mixed findings indicate the need for additional studies.

416

### 417 3.1.5 Other types of exercise

418

#### 419 *Human studies*

420

421 Besides the well-known exercise forms such as running and cycling, some studies have explored the  
422 effect of unconventional exercise training on cognition in T2DM.

423 For example, one study compared the effect of 36 weeks of Tai Chi Chuan, a mind-body exercise, and  
424 36 weeks of fitness walking on global cognitive function in T2DM patients. Both interventions  
425 significantly increased MoCA scores, with a significantly larger effect of Tai Chi Chuan compared to  
426 fitness walking [99].

427 The effect of low-intensity Qigong exercise on cognitive function in older T2DM patients was also  
428 investigated [100]. Qigong is an ancient Chinese exercise for mind-body integration and is often used  
429 in the prevention and treatment of chronic metabolic diseases [101]. The participants in the exercise  
430 group practiced Kinect-based Kaimai-style Qigong for 12 weeks. Based on MMSE scores at baseline  
431 and after the intervention, the Qigong group showed significant improvements in cognitive function  
432 compared to the control group [100].

433 Coelho Junior et al. (2018) investigated whether multicomponent exercise (MCE) improves executive  
434 function in T2DM. 72 T2DM patients performed MCE for 26 weeks. MCE consisted of 12 different  
435 exercises mimicking activities of daily live gestures, performed for 1 minute each, with each exercise  
436 immediately followed by a 2 minute walk. Although the patients showed an increased mobility after  
437 the intervention, they did not show improvements in executive function [102].

438

439 Finally, the effect of a 24-week square-stepping exercise (SSE) program on cognition in T2DM patients  
440 older than 49 years was also investigated. The researchers assessed global cognitive function,  
441 delineated into 4 domains: memory, reasoning, concentration and planning. The SSE group showed  
442 greater improvement in planning scores compared to the control group. However, the improvement  
443 in this specific domain might be related to the nature of the training program, where the participants  
444 are required to memorise patterns [103].

445 These findings suggest that unconventional exercise, often involving the mind to a larger extent than  
446 conventional exercise, can contribute to improved cognition in T2DM.



|                                                                                         | <i>Author</i>             | <i>Year</i> | <i>Age</i>                                       | <i>Population</i>                                                                             | <i>N intervention</i> | <i>Control group</i>                                                                                                           | <i>N controls</i>                 |
|-----------------------------------------------------------------------------------------|---------------------------|-------------|--------------------------------------------------|-----------------------------------------------------------------------------------------------|-----------------------|--------------------------------------------------------------------------------------------------------------------------------|-----------------------------------|
| <b>Endurance exercise training</b>                                                      | Leischik et al.           | 2021        | 59.1 (control); 60.4 (walking); 56.4 (pedometer) | T2DM patients walking or counting 10 000 steps/day with pedometer                             | 36 (18 per group)     | T2DM patients walking 30 min/day                                                                                               | 16                                |
|                                                                                         | Parsa et al.              | 2021        | 6-8 weeks                                        | Male diabetic albino Wistar rats with swimming training, P. Psyllium, or both                 | 30 (10 per group)     | Healthy sedentary control group, sedentary diabetic group                                                                      | 20 (10 per group)                 |
|                                                                                         | Anderson-Hanley et al.    | 2012        | 72.8/73.7                                        | T2DM patients                                                                                 | 10                    | Age-matched non-diabetic controls                                                                                              | 10                                |
|                                                                                         | Ploydang et al.           | 2023        | 60-75                                            | T2DM patients                                                                                 | 17                    | Non-exercising control T2DM                                                                                                    | 17                                |
|                                                                                         | Wang et al.               | 2023        | 60-75                                            | T2DM patients receiving endurance training                                                    | 40                    | T2DM patients without training                                                                                                 | 42                                |
|                                                                                         | Shekarchian et al.        | 2023        | 10-11 weeks                                      | Exercising adult male C57BL/6 J T2DM mice                                                     | 10                    | Non-exercising adult male C57BL/6 J T2DM and control mice + exercising control mice                                            | 30 (10 per group)                 |
|                                                                                         | Jesmin et al.             | 2022        | 8 weeks                                          | Otsuka-Long-Evans-Tokushima fatty (OLETF) rats                                                | 26                    | Long-Evans Tokushima (LETO) rats (sedentary, light intensity exercise, and moderate intensity exercise) + sedentary OLETF rats | 38 (13, 7, 5 and 13 respectively) |
|                                                                                         | Lang et al.               | 2020        | 10 weeks                                         | Exercising C57BL/6 T2DM mice (E)                                                              | 9                     | Control C57BL/6 mice (C), non-exercising T2DM mice (T), and exercising T2DM mice with nicotinamide treatment (NAM)             | 27 (9 per group)                  |
|                                                                                         | Shima et al.              | 2017        | 26 weeks                                         | Exercising Otsuka-Long-Evans-Tokushima fatty (OLETF) rats                                     | 6 to 8                | Exercising and non-exercising Long-Evans Tokushima (LETO) rats + non-exercising OLETF rats                                     | 6 to 8 per group                  |
|                                                                                         | Shima et al.              | 2023        | 8 weeks                                          | Exercising ob/ob mice                                                                         | 5                     | Sedentary ob/ob mice and sedentary C57BL/6 mice                                                                                | 10 (5 per group)                  |
| <b>Resistance exercise training</b>                                                     | Zhao et al.               | 2022        | 67.9 ± 5.5                                       | T2DM patients with power training                                                             | 49                    | T2DM patients with sham low-intensity training (same machines: 3 sets of 8 reps with empty bar)                                | 54                                |
|                                                                                         | Yamamoto et al.           | 2021        | 72.9 ± 2.4                                       | T2DM patients performing resistance exercise or resistance exercise + leucine supplementation | 18 (R)<br>17 (RL)     | Control group of T2DM patients                                                                                                 | 17                                |
| <b>Endurance vs. resistance exercise training<br/>Combined endurance and resistance</b> | Teixeira et al.           | 2019        | 55 ± 12                                          | Patients with T2DM and/or systemic arterial hypertension performing resistance training       | 6                     | Patients with T2DM and/or systemic arterial hypertension performing endurance training                                         | 7                                 |
|                                                                                         | Silveira-Rodrigues et al. | 2021        | 63.9 ± 7.7 (training)<br>63.3 ± 7.8 (control)    | T2DM patients                                                                                 | 16                    | T2DM control group                                                                                                             | 15                                |



*exercise  
training*

*Other exercise  
types*

|                           |      |                                           |                                                                                                       |                      |                                                                                                                                                                                                       |                                        |
|---------------------------|------|-------------------------------------------|-------------------------------------------------------------------------------------------------------|----------------------|-------------------------------------------------------------------------------------------------------------------------------------------------------------------------------------------------------|----------------------------------------|
| Espeland et al.           | 2017 | 70-89                                     | Sedentary non-demented T2DM patients and non-diabetic adults receiving physical activity intervention | 735                  | Sedentary non-demented T2DM patients and non-diabetic adults receiving health education                                                                                                               | 741                                    |
| Silveira-Rodrigues et al. | 2023 | 63±8                                      | T2DM patients performing combined training                                                            | 17                   | Control T2DM patients not exercising                                                                                                                                                                  | 18                                     |
| Ghodrati et al.           | 2023 | 55-70                                     | Women with T2DM receiving combined training                                                           | 13                   | T2DM women not receiving intervention                                                                                                                                                                 | 9                                      |
| Martinez-Velilla et al.   | 2021 | 86 ± 5 (control)<br>87 ± 4 (intervention) | Acutely hospitalised elderly T2DM patients in exercise group                                          | 54                   | control acutely hospitalised elderly T2DM patients                                                                                                                                                    | 49                                     |
| Callisaya et al.          | 2017 | 66.2                                      | T2DM patients receiving intervention                                                                  | 24                   | T2DM patients who received upper and lower limb stretching of light intensity and a gentle movement program, which were performed in the same volume, frequency and setting as the intervention group | 23                                     |
| Ghahfarrokhi et al.       | 2024 | 67.5 ± 5.8                                | Elderly, cognitively impaired T2DM patients performing HIFT or LIFT                                   | 32<br>(16 per group) | Elderly, cognitively impaired T2DM patients without intervention                                                                                                                                      | 16                                     |
| Shellington et al.        | 2018 | 71.2 (6.9)<br>65.9 (5.2) (SSE)            | T2DM patients with self-reported cognitive complaints performing SSE                                  | 12                   | T2DM patients with self-reported cognitive complaints without intervention                                                                                                                            | 13                                     |
| Chen et al.               | 2023 | 67.55 [5.02]                              | T2DM patients performing Tai Chi Chuan                                                                | 107                  | T2DM patients performing fitness walking + control group receiving only self-management education                                                                                                     | 110 (fitness walking)<br>111 (control) |
| Cai et al.                | 2019 | older adults                              | T2DM patients performing Qigong exercise                                                              | 27                   | Control T2DM group without intervention                                                                                                                                                               | 28                                     |
| Coelho Junior et al.      | 2018 | 64.4 ± 5.7 (control)<br>66.0 ± 3.2 (T2DM) | T2DM patients performing MCE                                                                          | 72                   | Age-matched healthy controls performing MCE                                                                                                                                                           | 72                                     |

|                                    | <i>Author</i>          | <i>Type of exercise training</i>                   | <i>Duration of exercise training</i> | <i>Duration of each session</i>        | <i>Frequency of exercise training</i> | <i>Intensity of exercise training</i>                                                                  | <i>Outcomes (cognitive tests)</i>                                                                                                       | <i>Main results</i>                                                                                                                                                                            |
|------------------------------------|------------------------|----------------------------------------------------|--------------------------------------|----------------------------------------|---------------------------------------|--------------------------------------------------------------------------------------------------------|-----------------------------------------------------------------------------------------------------------------------------------------|------------------------------------------------------------------------------------------------------------------------------------------------------------------------------------------------|
| <b>Endurance exercise training</b> | Leischik et al.        | Walking                                            | 12 weeks                             | 40 min                                 | 3x/week                               | ?                                                                                                      | FAIR-Test 2, verbal memory, non-verbal memory                                                                                           | Walking and counting steps led to enhanced cognitive performance pace and concentration                                                                                                        |
|                                    | Parsa et al.           | Swimming training                                  | 12 weeks                             | 40 min                                 | 5 days/week                           | ?                                                                                                      | Cognitive memory: novel object recognition test and elevated plus maze<br>Aversive memory and learning: passive avoidance learning test | Swimming training alone insignificantly improved exploratory behaviour, locomotor activity, and passive avoidance memory, and non-spatial cognitive memory compared to sedentary diabetic rats |
|                                    | Anderson-Hanley et al. | Endurance exercise on stationary bike or cybicycle | 3 months                             | 45 min                                 | 5x/week                               | Moderate to vigorous                                                                                   | Executive function: Colour trails 2 test, Stroop C test, Digit span backwards test                                                      | Significant improvements in colour trails 2 test in exercise group                                                                                                                             |
|                                    | Ploydang et al.        | Aquatic Nordic walking                             | 12 weeks                             | 60 min                                 | 3x/week                               | First 6 weeks: 40-50% HRR<br>Last 6 weeks: 50-60% HRR                                                  | MoCA, MMSE, trail making test part B, Stroop colour and word test                                                                       | Significantly increased MoCA scores in Nordic walking group. No significant improvements in MMSE, Stroop test, or trail making test.                                                           |
|                                    | Wang et al.            | Aerobic dancing                                    | 1 year                               | 60 min                                 | 3x/week                               | ?                                                                                                      | MMSE + MoCA                                                                                                                             | Aerobic training group had significantly increased MMSE and MoCA scores compared to the control group                                                                                          |
|                                    | Shekarchian et al.     | Swimming                                           | 4 weeks                              | Week 1-2: 3x10min<br>week 3-4: 6x10min | 5 days/week                           | ?                                                                                                      | Working memory (Y maze), recognition memory (Novel object recognition), spatial memory, (Morris water maze)                             | Exercise improved all memory aspects in exercising T2DM mice compared to non-exercising T2DM mice                                                                                              |
|                                    | Jesmin et al.          | Treadmill running                                  | 4 months                             | 30min/day                              | 5 days/week                           | Light intensity: OLETF 7.0 m/min, LETO 10.0 m/min; moderate intensity: OLETF 12.5 m/min, LETO 20 m/min | Morris water maze                                                                                                                       | Shortened swim length and escape latency in both light and moderate exercise groups → improved memory                                                                                          |
|                                    | Lang et al.            | Treadmill running                                  | 8 weeks                              | 37min/day                              | 5 days/week                           | Moderate intensity                                                                                     | Morris water maze                                                                                                                       | Compared with T group, the escape latency of E group was significantly reduced on day 4–5, treadmill exercise significantly increased the number of platform crossings in E group              |

|                                                  |                           |                                                                                                                                                                                        |           |           |             |                                                                  |                                                                                                                                                                                                                                                                                                                                                            |                                                                                                                                                                                                                                                                            |
|--------------------------------------------------|---------------------------|----------------------------------------------------------------------------------------------------------------------------------------------------------------------------------------|-----------|-----------|-------------|------------------------------------------------------------------|------------------------------------------------------------------------------------------------------------------------------------------------------------------------------------------------------------------------------------------------------------------------------------------------------------------------------------------------------------|----------------------------------------------------------------------------------------------------------------------------------------------------------------------------------------------------------------------------------------------------------------------------|
| <i>Resistance exercise training</i>              | Shima et al.              | Treadmill running                                                                                                                                                                      | 4 weeks   | 30min/day | 5 days/week | Moderate-intensity (OLETF rats, 12.5 m/min; LETO rats, 20 m/min) | Morris water maze                                                                                                                                                                                                                                                                                                                                          | Escape latency and swim path length of exercising OLETF rats were shortened, without alteration of the speed of swimming, at trials on days 2, 3 and 4.<br>The time spent by OLETF rats in the platform area significantly improved after 4 weeks of exercise              |
|                                                  | Shima et al.              | Running on a forced exercise wheel bed                                                                                                                                                 | 4 weeks   | 30min/day | 5 days/week | Light intensity                                                  | Morris water maze                                                                                                                                                                                                                                                                                                                                          | No effect of exercise on the escape latency, swim distance or speed in ob/ob mice. The times of crossing the target platform during the probe test in C57BL/6 mice were significantly greater than that in sedentary ob/ob mice, but not than that in exercised ob/ob mice |
|                                                  | Zhao et al.               | Whole-body, machine based power training (3 sets of 8 reps of lateral pulldown, chest press, upper back, leg press, knee extension, and knee flexion, hip extension and hip abduction) | 12 months | ?         | 3 days/week | High intensity (15-18 on Borg scale, 80% 1RM)                    | Memory: word list memory, word list recall, and word list recognition subtests of the Consortium to Establish a Registry for Alzheimer's Disease Attention/speed: Trail Making Test Part A (Trails A)<br>Executive function: Trail Making Test Part B (Trails B) and the Trail Making Test B minus A (Trails B minus A)<br>Global cognitive function: MMSE | Cognition of both groups improved over time, with increased scores in the Trails A, Trails B, word list recall, and word list memory                                                                                                                                       |
| <i>Endurance vs resistance exercise training</i> | Yamamoto et al.           | Body weight resistance training + exercises with elastic bands: tube fly, front raise, hammer curl, leg extension, calf raise, and squat. Performed 20 times each                      | 48 weeks  | ?         | Daily       | ?                                                                | MMSE                                                                                                                                                                                                                                                                                                                                                       | No significant changes in MMSE score                                                                                                                                                                                                                                       |
|                                                  | Teixeira et al.           | Endurance exercise: elliptical, bike, treadmill, or upper-body cycle ergometer<br>Resistance exercise                                                                                  | 12 weeks  | 40 min    | 3x/week     | Endurance: 60% HRmax<br>resistance: 11-12 Borg scale             | Mental test and training system (MTTS): cognitrone (attention and concentration), determination test (reaction time), visual pursuit test (selective attention)                                                                                                                                                                                            | The group with both T2DM and hypertension showed a significantly increased number of reactions, but no significantly improved reaction time. No differences were observed between the endurance and resistance exercise group.                                             |
| <i>Combined endurance and resistance</i>         | Silveira-Rodrigues et al. | 6 resistance exercises (reverse grip lat pulldown, leg press, bench press machine, calf raises                                                                                         | 8 weeks   | ?         | 3x/week     | ?                                                                | MoCA                                                                                                                                                                                                                                                                                                                                                       | Significantly improved inhibitory control, working memory, cognitive flexibility, and                                                                                                                                                                                      |

**exercise training**

|                           |                                                                                                                                                                                                                                                                                                                                                                                                                                            |          |          |                         |                                                   |                                                                                                                                                                                                                                                                                                                                                                                                            |                                                                                                                                                                                                            |
|---------------------------|--------------------------------------------------------------------------------------------------------------------------------------------------------------------------------------------------------------------------------------------------------------------------------------------------------------------------------------------------------------------------------------------------------------------------------------------|----------|----------|-------------------------|---------------------------------------------------|------------------------------------------------------------------------------------------------------------------------------------------------------------------------------------------------------------------------------------------------------------------------------------------------------------------------------------------------------------------------------------------------------------|------------------------------------------------------------------------------------------------------------------------------------------------------------------------------------------------------------|
|                           | machine, dumbbell shoulder press, and abdominal crunches) + 15 min of treadmill walking, with increasing weight and repetition number over 8 weeks                                                                                                                                                                                                                                                                                         |          |          |                         |                                                   |                                                                                                                                                                                                                                                                                                                                                                                                            | attention in the exercise group compared to the control group                                                                                                                                              |
| Espeland et al.           | Walking, resistance training, and flexibility exercises                                                                                                                                                                                                                                                                                                                                                                                    | 2 years  | 50 min   | 3-4x/week               | Moderate intensity                                | Modified MiniMental State Exam (3MSE) (global cognitive function); the Wechsler Adult Intelligence Scale-III Digit Symbol Coding test (DSC) (psychomotor speed, attention, and working memory); Hopkins Verbal Learning Test-Revised (HVL-T-D) (delayed recall) Computer tests (processing speed and executive function): 1-back and 2-back tasks, the Eriksen Flanker task, and a task-switching paradigm | Global cognitive function and delayed memory, significantly improved only in T2DM patients who received training                                                                                           |
| Silveira-Rodrigues et al. | Combined training: endurance exercise + resistance exercise                                                                                                                                                                                                                                                                                                                                                                                | 8 weeks  | 40-60min | 3x/week                 | ?                                                 | Executive function: Trail Making Test, Stroop Colour Task, and Digit Span Long-term memory: simplified Taylor Complex Figure Test                                                                                                                                                                                                                                                                          | Executive function was significantly improved in exercise group                                                                                                                                            |
| Ghodrati et al.           | Combined training: endurance + resistance + balance exercises                                                                                                                                                                                                                                                                                                                                                                              | 12 weeks | 65 min   | 3x/week                 | Endurance: 55-75% Hrmax<br>resistance: 65-85% 1RM | MoCA, digit symbol substitution test, forward digit span test                                                                                                                                                                                                                                                                                                                                              | Intervention group scored significantly higher on MoCA than control group, and increased score with 3.1 compared to baseline. No improvement in digit symbol substitution test or forward digit span test. |
| Martinez-Velilla et al.   | Combination of resistance, balance, and walking exercises. Squats rising from a chair, leg press, and bilateral knee extension, seated bench press. semitandem foot standing, line walking, stepping practice, walking with small obstacles, proprioceptive exercises on unstable surfaces, altering the base of support, and weight transfer from one leg to the other, knee extension and flexion, hip abduction, walking along corridor | 8 days   | 20 min   | 2x/day<br>5-7 days/week | ?                                                 | MMSE                                                                                                                                                                                                                                                                                                                                                                                                       | After the intervention, the exercise group scored on average 1.6 points higher than the control group (23.7 vs. 22.1), significant                                                                         |
| Callisaya et al.          | Combination of endurance and resistance exercise                                                                                                                                                                                                                                                                                                                                                                                           | 6 months | 1 hour   | 3x/week                 | Started at low to moderate, progressed            | MRI to measure cortical thickness, total brain volume, hippocampal volume and white matter volume, and white                                                                                                                                                                                                                                                                                               | The intervention group showed improved hippocampal and total brain volumes, improved white matter integrity, and less                                                                                      |

449  
450  
451  
452

*Other exercise types*

|                      |                                                                                                                                                 |          |                                      |                                  |                                                                    |                         |                                                                                                                                                                                                                                                                                                                                                                       |                                                                                                                                                                                                                                                                                         |
|----------------------|-------------------------------------------------------------------------------------------------------------------------------------------------|----------|--------------------------------------|----------------------------------|--------------------------------------------------------------------|-------------------------|-----------------------------------------------------------------------------------------------------------------------------------------------------------------------------------------------------------------------------------------------------------------------------------------------------------------------------------------------------------------------|-----------------------------------------------------------------------------------------------------------------------------------------------------------------------------------------------------------------------------------------------------------------------------------------|
|                      |                                                                                                                                                 |          |                                      |                                  |                                                                    | to moderate to vigorous | matter microstructure<br>Cognitive function: Victoria Stroop test, the Trail Making Test (shifting score B-A), the Digit Symbol Coding Test, the digit span subtest of the Wechsler Adult Intelligence Scale (third edition), Controlled Oral Word Association Test, the three part Hopkins Verbal Learning Test (revised), and the Rey Complex Figure copy and delay | decline in white matter volume. They also showed a better global cognitive score, and better performance on the Digit Symbol Coding Test, Rey Complex Copy test, Stroop C-D, Trail Making Test A and B, Hopkins intermediate and recognition, and Controlled Oral Word Association Test |
| Ghahfarrokhi et al.  | Endurance exercises, upper and lower body strength, balance exercises and maintaining posture, and hip control exercises and mid-body stability | 6 weeks  | 30-35 min (HIFT)<br>40-45 min (LIFT) | 3x/week (HIFT)<br>5x/week (LIFT) | HIFT: 100-120% lactate threshold<br>LIFT: 70-75% lactate threshold |                         | MMSE, Symbol Digit Modalities Test (SDMT), CVLT-II, Brief Visuospatial Memory Test-Revised (BVM-T-R), Stroop tests                                                                                                                                                                                                                                                    | MMSE, Stroop, SDMT, CVLT-II and BVM-T-R scores improved significantly in the HIFT group. MMSE and Stroop scores improved significantly in the LIFT group. Only change in Stroop scores in the HIFT group was significantly different from the control group.                            |
| Shellington et al.   | Square-stepping exercise (SSE) program                                                                                                          | 24 weeks | 60 min (45 min SSE)                  | 2x/week                          | Low intensity                                                      |                         | 12-item computer-based Cambridge Brain Sciences (CBS) cognitive battery to test memory, concentration, planning, reasoning + combined global cognitive function score                                                                                                                                                                                                 | The SSE group showed greater improvement in planning scores compared to the control group, no other improvements                                                                                                                                                                        |
| Chen et al.          | 24-form simplified tai chi chuan                                                                                                                | 36 weeks | 60 min                               | 3x/week                          | Moderate intensity                                                 |                         | MoCA                                                                                                                                                                                                                                                                                                                                                                  | Both interventions significantly increased MoCA scores, with a significantly larger effect of Tai Chi Chuan compared to fitness walking                                                                                                                                                 |
| Cai et al.           | Kinect-based Kaimai-style Qigong                                                                                                                | 12 weeks | 30 min                               | 3x/week                          | Low intensity                                                      |                         | MMSE                                                                                                                                                                                                                                                                                                                                                                  | Qigong group showed significant improvements in cognitive function compared to the control group                                                                                                                                                                                        |
| Coelho Junior et al. | Multicomponent exercise: 12 different exercises mimicking activities of daily life gestures                                                     | 26 weeks | 36 min                               | 2x/week                          | Moderate to hard                                                   |                         | Timed up-and-go cognitive test                                                                                                                                                                                                                                                                                                                                        | No improvements in executive function in T2DM                                                                                                                                                                                                                                           |

### 453 **3.2 Reviewing targets and mediators of the effect of exercise training on the brain in T2DM**

454 To understand why certain exercise trainings cause cognitive improvement in T2DM, and others do  
455 not, there is a need for studies investigating the underlying biomedical mechanisms of the effect of  
456 exercise on the brain and cognition in T2DM. This knowledge can contribute to the development of  
457 pharmacological therapies and exercise programs specifically designed for improving brain health and  
458 cognition in T2DM in the most efficient way. The following section discusses such studies, and aims to  
459 identify the different targets and mediators involved. Although there is much more extensive literature  
460 available on the possible mediators of the effect of exercise on the brain in T2DM, this review will  
461 solely focus on the studies in T2DM that have actually demonstrated an involvement of certain  
462 mediators.

463

#### 464 3.2.1 AD-related pathological markers: amyloid $\beta$ peptides and hyperphosphorylated tau

465

466 Increasing evidence and literature points to converging pathways and pathogenetic processes in T2DM  
467 and AD. Here we focus on studies showing effects on amyloid  $\beta$  and tau in T2DM due to exercise  
468 training. We refer to extensive reviews regarding T2DM and AD for further reading [24, 104, 105].

469

##### 470 *Leptin*

471 Several studies have indicated that exercise is negatively associated with cerebral amyloid  $\beta$  and  
472 hyperphosphorylated tau in T2DM, and contributes to memory maintenance [106, 107]. The aspartyl  
473 protease  $\beta$ -site A $\beta$ PP-cleaving enzyme 1 (BACE1) is responsible for catalysing the rate-limiting step of  
474 amyloid  $\beta$  production. It has been shown that the adipocytokine leptin reduces BACE1 activity and  
475 expression, thereby limiting the production of amyloid  $\beta$  [108, 109]. This is supported by Rezaei et al.  
476 (2023), who suggested leptin as a possible mediator of exercise-induced prevention of memory  
477 impairment in T2DM after finding elevated serum and hippocampal levels of this hormone together  
478 with decreased hippocampal levels of BACE1, amyloid  $\beta$  and hyperphosphorylated tau after 8 weeks  
479 of HIIT training in T2DM rats [110].

480

##### 481 *GSK3 $\beta$*

482 The maintenance of cognitive function in exercising T2DM rats treated with dexamethasone,  
483 demonstrated by De Sousa et al. (2020), was according to the authors presumably mediated by the  
484 observed lesser inhibition of the activation of hippocampal IRS-1 and higher concentration of GSK3 $\beta$   
485 phosphorylated on serine-9 (Ser-9) [111]. GSK3 $\beta$  is namely inactivated by Ser-9 phosphorylation [112],  
486 which prevents GSK3 $\beta$  activation, and subsequently tau phosphorylation and associated neurotoxic  
487 effects [113, 114]. Accordingly, Rezaei et al. (2023) also found decreased hippocampal GSK3 $\beta$   
488 dephosphorylation together with decreased hippocampal levels of amyloid  $\beta$  and phosphorylated tau  
489 in HIIT-trained T2DM rats [110]. GSK3 $\beta$  plays an important role in neurodegeneration in T2DM. Both  
490 glucolipotoxicity and insulin resistance contribute to GSK3 $\beta$  overactivation, leading to  $\beta$ -catenin  
491 phosphorylation and subsequent proteasomal degradation. This results in the inhibition of the  
492 expression of reactive oxygen species (ROS) scavenging enzymes, which leads to more oxidative stress  
493 and consequently the disruption of mitochondrial structure, function and axonal trafficking. Moreover,  
494 GSK3 $\beta$  overactivation also stimulates tau hyperphosphorylation, leading to microtubule destabilisation  
495 and thus disruption of axonal mitochondrial trafficking, as well as to a decrease in mitochondrial  
496 complex I and thus impaired energy production [114]. By inhibiting the activation of GSK3 $\beta$  through  
497 Ser-9 phosphorylation, exercise could thus contribute to the prevention of cognitive decline in T2DM.

498

##### 499 *Adiponectin*

500 In the study of Rezaei et al. (2023), the T2DM rats showed decreased serum and hippocampal levels of  
501 insulin and adiponectin at baseline, as well as decreased levels of insulin receptors, adiponectin  
502 receptors and AMPK in the hippocampus, and increased hippocampal GSK3 $\beta$  and  
503 hyperphosphorylated tau. HIIT training counteracted these findings. Both serum insulin and



504 adiponectin were significantly increased by HIIT, as well as the levels of hippocampal insulin and  
505 adiponectin receptors. HIIT training also increased hippocampal AMPK phosphorylation, and  
506 decreased hippocampal tau phosphorylation and GSK3 $\beta$  dephosphorylation. The authors suggest that  
507 the increased levels of adiponectin can contribute to the preservation of hippocampal volume and  
508 function through the stimulation of synaptic plasticity, as it has been shown by Pousti et al. (2018) and  
509 Weisz et al. (2017) respectively that adiponectin modulates synaptic plasticity in the hippocampal  
510 dentate gyrus and regulates hippocampal synaptic transmission [110, 115, 116]. Another study shows  
511 memory and learning impairments together with reduced AMPK phosphorylation and increased GSK3 $\beta$   
512 activation in adiponectin-knockout mice [117], suggesting that the neuroprotective effects of  
513 adiponectin are mediated via AMPK phosphorylation and GSK3 $\beta$  inactivation, which is in line with the  
514 study of Rezaei et al. (2023). The exercise-induced decreased GSK3 $\beta$  Ser-9 dephosphorylation means  
515 that there is a higher ratio of inactive, phosphorylated GSK3 $\beta$ , preventing tau phosphorylation. In  
516 addition, the adiponectin-mediated AMPK phosphorylation could also be neuroprotective by inhibiting  
517 the inflammatory response of microglia to amyloid  $\beta$  [118].

518

### 519 3.2.2 Brain volume

520

521 Several studies have demonstrated that exercise increases hippocampal volume in T2DM patients. One  
522 study showed that a higher step count, measured over 7 days, was associated with a larger  
523 hippocampal volume in T2DM patients [59]. In addition, one year of endurance training in T2DM  
524 patients with normal cognition significantly increased hippocampal volume, and prevented a decline  
525 in MMSE and MoCA scores. Hippocampal volume in the training group was significantly increased  
526 compared to baseline, as well as compared to the control group [79]. Another study showed a higher  
527 hippocampal CA1 and CA3 neuronal density in diabetic Sprague-Dawley (SD) rats after 6 weeks of  
528 exercise on a running wheel, probably contributing to the observed improved cognitive function [119].  
529 Similarly, a pilot study in which T2DM patients performed 6 months of a progressive endurance- and  
530 resistance-training program showed improved hippocampal and total brain volumes, improved white  
531 matter integrity, and less decline in white matter volume in the intervention group compared to the  
532 control group [97].

533

### 534 3.2.3 Neuronal survival

535

#### 536 *BDNF*

537 BDNF is one of the most important neurotrophic factors. By binding the TrkB receptor, it regulates and  
538 promotes cell survival, neuroplasticity, and neurogenesis in the central nervous system [120, 121]. As  
539 already mentioned previously, BDNF plays an important role in the effect of exercise on cognitive  
540 function. A study investigating the effect of 4 weeks of swimming training on working, spatial, and  
541 recognition memory in diabetic C57BL/6 J mice, shows that higher PA is associated with increased  
542 hippocampal and prefrontal BDNF levels, together with an improvement in all memory aspects [80].  
543 Similarly, Jesmin et al. (2022) showed significantly increased hippocampal BDNF levels together with  
544 improved memory function in OLETF rats after 4 months of endurance exercise [83]. This shows that  
545 also under diabetic conditions, BDNF is an important mediator of exercise effects on cognition.

546

547 Another study looked into the effect of 12 weeks of swimming training on BDNF/TrkB signalling and  
548 apoptosis in the cerebral cortex of male diabetic C57BL/6JNarl mice. The exercised diabetic mice  
549 showed less neural apoptosis compared to the control diabetic mice, accompanied by an increased  
550 activity of the BDNF/TrkB signaling pathway, and a decreased activity of the Fas/FasL-mediated and  
551 mitochondria-initiated apoptotic pathways. These findings indicate that exercise promotes neuronal  
552 survival in diabetic mice through the BDNF pathway [122].

553

### 554 3.2.4 Neuroplasticity and neurogenesis

555

556 One study determined the effect of 7 weeks of treadmill exercise on neuroblast differentiation in the  
557 subgranular zone of the dentate gyrus (SZDG) in Zucker diabetic fatty (ZDF) rats and Zucker lean control  
558 (ZLC) rats. At 23 weeks old, the rats started to exercise for 7 weeks at 12-16m/min. Compared to the  
559 non-exercising groups, the neuroblasts of both the exercising diabetic and exercising control rats  
560 showed a significant increase in tertiary dendrites. However, the number of neuroblasts only increased  
561 in the control rats. This shows that endurance exercise in diabetic rats can stimulate neuroplasticity,  
562 but not necessarily neuroproliferation [123]. A similar study tested the effect of 5 weeks of treadmill  
563 exercise on cell differentiation and proliferation in the SZDG of the same ZDF rat model. Proliferation  
564 was detected by means of the proliferation marker Ki67, and progenitor differentiation into neurons  
565 was detected by means of the differentiation marker doublecortin (DCX). In this study, the rats started  
566 exercising at 6 weeks old, and ran at 22m/min. Compared to the sedentary ZDF rats, the exercised rats  
567 showed a significant increase in Ki67 positive cells and DCX-immunoreactive structures, indicating both  
568 increased proliferation and increased differentiation [124]. This confirms that exercise can stimulate  
569 neuronal differentiation in the diabetic SDZG, as shown by Hwang et al. (2010) [123]. The fact that, this  
570 time, exercise was able to stimulate neuronal proliferation as well, might indicate that exercise has to  
571 be performed at a certain intensity rather than a certain volume to achieve this effect.

572

### 573 *BDNF*

574 Increased hippocampal BDNF levels in combination with increased dendritic spine density on the  
575 secondary and tertiary dendrites of dentate granule neurons were found after voluntary wheel running  
576 in *db/db* mice [125]. This suggests that BDNF contributes to exercise-induced neuroplasticity in  
577 diabetic mouse models.

578

### 579 *PI3K/Akt and AMPK/SIRT1*

580 It was demonstrated that endurance exercise can upregulate synaptic plasticity-associated proteins in  
581 the hippocampus of T2DM rats, presumably via the activation of PI3K/Akt/mTOR and AMPK/SIRT1  
582 signalling pathways and inhibition of the NFκB/NLRP3/IL-1β signalling pathway [126]. Under non-  
583 diabetic conditions, the PI3K/Akt/mTOR pathway is activated by insulin, resulting in the formation of  
584 dendritic spines and excitatory synapses in hippocampal neurons [127]. In T2DM, insulin resistance  
585 prevents this activation, contributing to reduced synaptic plasticity. Exercise thus could, to a certain  
586 extent, take over this role of insulin. The aforementioned BDNF also activates the PI3K/Akt pathway,  
587 constituting another mediator of the exercise-induced increase in synaptic plasticity-associated  
588 proteins [120]. Activation of the AMPK/SIRT1 pathway, on the other hand, contributes to synaptic  
589 plasticity by increasing insulin sensitivity and glucose uptake, regulating BDNF expression, promoting  
590 neuronal survival, etc. [128-132]. During exercise, AMPK activates SIRT1, after which SIRT1  
591 deacetylates PGC-1α, resulting in its activation. PGC-1α is important for mitochondrial remodelling and  
592 biogenesis, contributing to synaptic plasticity [133]. Its activation leads to the upregulation of FNDC5,  
593 which in turn crosses the BBB and upregulates hippocampal BDNF expression [120].

594

595 Another study also found an increase in the synaptic plasticity proteins synaptophysin (SYN) and N-  
596 methyl-D-aspartate receptor (NMDAR) in the prefrontal cortex of diabetic SD rats after 4 weeks of  
597 treadmill training. They demonstrated that endurance exercise increased the level of phosphorylated  
598 PI3K, suggesting an increased activity of the PI3K/Akt pathway, and increased insulin sensitivity. In  
599 addition, they found a slight increase in the phosphorylation and a slight decrease in the acetylation  
600 of FOXO1, which is a transcription factor that promotes NF-κB activity and consequently the expression  
601 of proinflammatory factors. FOXO1 phosphorylation enables its cytoplasmic retention and thus  
602 prevents the transcription of its target inflammatory genes [134]. Since FOXO is a target of Akt, the  
603 increased PI3K/Akt activity might be the cause of the increased FOXO1 phosphorylation [135]. Nuclear  
604 NF-κB acetylation was found to be decreased as well in the rats that performed endurance exercise,  
605 reducing its DNA binding and transcriptional activity [134, 136]. These findings were confirmed by a  
606 study showing that 8 weeks of moderate intensity treadmill exercise in diabetic C57BL/ 6 mice

607 improves cognitive dysfunction and increases the release of BDNF through the activation of the  
608 SIRT1/PGC-1 $\alpha$ /FNDC5/BDNF pathway [84].

609

### 610 3.2.5 Cerebral blood flow

611

612 Zhao et al. (2023) investigated the effect of a 2-month moderate-intensity exercise program on brain  
613 oxygenation in sedentary older T2DM patients with cognitive impairment. They also looked into the  
614 effect of the exercise program on the hemodynamic responses to the Mini-Cog test, which assesses  
615 short-term memory and visuo-constructive abilities. The exercise program consisted of a combination  
616 of endurance and resistance exercise. They found that the exercise program improved the very low-  
617 frequency oscillations (<0.05 Hz) during the Mini-Cog test, as assessed by near-infrared spectroscopy.  
618 Since very-low frequency oscillations are crucial for small-vessel function, this indicates that combined  
619 exercise has the power to improve cerebral vascular function in T2DM. In addition, the exercise  
620 program significantly reduced the oxyhemoglobin (oxyHb) activation in the right superior frontal  
621 region during the Mini-Cog test, thereby reducing the overactivation usually observed in T2DM [137].

622

### 623 3.2.6 Glycometabolism

624

#### 625 *Lactate*

626 Since dysregulated peripheral glycometabolism is a hallmark of T2DM, Shima et al. (2017)  
627 hypothesised that hippocampal glycometabolic dysfunction might contribute to memory impairment  
628 in T2DM [85]. As it has already been demonstrated in healthy animals that moderate exercise enhances  
629 memory function and hippocampal glycogen levels [138, 139], they wanted to determine if this was  
630 also the case in a T2DM animal model. At baseline, OLETF rats had higher hippocampal levels of  
631 glycogen and lower MCT2 expression compared to LETO control rats. They also showed impaired  
632 memory. After 4 weeks of treadmill running, the OLETF rats showed even higher hippocampal glycogen  
633 levels, in addition to normalised hippocampal MCT2 expression together with improved memory  
634 function. Since MCT2 is an important lactate transporter, this suggests that lactate plays a key role in  
635 the effect of exercise on glycometabolism and memory in T2DM [85]. In line with this, it was  
636 demonstrated that 4 months of treadmill running prevented the progression of cognitive decline in  
637 presymptomatic OLETF rats through improved hippocampal MCT2 expression, again confirming the  
638 role of lactate in the positive effect of exercise on cognition [83]. Another study by Shima et al. (2023)  
639 showed the same effect in an advanced stage T2DM mouse model. Ob/ob mice were subjected to 4  
640 weeks of light-intensity exercise. The exercise program resulted in improved hippocampal MCT2 levels,  
641 accompanied by improved hippocampal memory retention [86]. As Soya et al. (2019) mention in their  
642 review discussing these findings, the upregulated MCT2 levels enable an increased uptake of L-lactate  
643 into neurons, where it can serve as an energy substrate, and act as a signalling molecule to induce the  
644 expression of neuroplasticity genes, eventually contributing to the increased memory function  
645 observed in these studies [140].

646

### 647 3.2.7 Inflammation

648

649 As inflammation is a very broad process, involving many different players, we would like to emphasize  
650 again that the pathways and mediators discussed in this review are only the ones that clearly have  
651 been shown to be involved in the effect of exercise on the brain in T2DM. For more information about  
652 the involvement of inflammation in T2DM, and the effect of exercise on it, we refer to more exhaustive  
653 reviews [71, 141].

654

#### 655 *AMPK/SIRT1*

656 The AMPK/SIRT1 pathway is not only important for rescuing cognitive function by increasing BDNF  
657 levels, but also by counteracting inflammation. Treadmill exercise in diabetic C57BL/6 mice for 8 weeks  
658 reduced activation of hippocampal proinflammatory microglia M1, as well as the hippocampal levels

659 of proinflammatory factors IL-1 $\beta$ , IL-6, TNF- $\alpha$ , and increased the expression levels of anti-inflammatory  
660 factors IL-10, TGF- $\beta$ 1. This co-occurred with an activation of the SIRT1/NF- $\kappa$ B pathway, which is known  
661 to be responsible for counteracting inflammation, suggesting the importance of this pathway in  
662 exercise-mediated anti-inflammatory actions in T2DM [84]. A different study also reported a reduction  
663 in hippocampal IL-1 $\beta$  and TNF- $\alpha$ , accompanied by cognitive improvement, after T2DM SD rats  
664 performed 6 weeks of endurance exercise on a running wheel. However, although we can assume that  
665 the AMPK/SIRT1 pathway is involved here as well, the authors did not elaborate on the pathways  
666 responsible for the observed reduction in pro-inflammatory factors [119].

667

### 668 3.2.8 Insulin resistance

669

670 T2DM-associated insulin resistance is not only present in the periphery, but also in the brain, where it  
671 contributes to the cognitive deficits observed in T2DM patients via multiple mechanisms [128, 142-  
672 144]. For example, insulin resistance and the consequent hyperinsulinemia have been associated with  
673 increased tau hyperphosphorylation, increased deposition together with reduced breakdown of  
674 amyloid  $\beta$ , dysfunctional IGF-1 receptors (IGFRs), etc. This all contributes to neurodegeneration and  
675 cognitive impairment [142]. Studies have shown that the insulin-sensitising effect of exercise is also  
676 manifested in the brain, which gives exercise the power to prevent or decrease these cognitive deficits  
677 [145, 146]. One possible way in which this effect of exercise could be mediated, is by the afore-  
678 mentioned decrease in TNF- $\alpha$ . TNF- $\alpha$  activates JNK, which is a kinase that causes insulin resistance via  
679 serine phosphorylation of IRS-1 [71, 147]. IRS-1 is important for the signal transduction of insulin,  
680 ultimately leading to glycogen synthesis and glucose transporter 4 (GLUT-4) translocation. Serine  
681 phosphorylation of IRS-1 inhibits this insulin signal transduction and thus results in insulin resistance  
682 [148-150]. It could thus be hypothesised that by decreasing TNF- $\alpha$ , exercise could increase insulin  
683 sensitivity in the brain.

684

### 685 *GLP-1*

686 Park et al. (2019) investigated the effect of resistance exercise training on GLP-1R levels in the  
687 hypothalamus of OLETF rats. The exercise training comprised 12 weeks of ladder climbing. As a result  
688 of the resistance training, the rats showed increased levels of hypothalamic GLP-1R mRNA, protein  
689 kinase A (PKA), protein kinase B (PKB), glucose transporter 2 (GLUT-2), and decreased hypothalamic  
690 levels of protein kinase C- $\iota$  (PKC- $\iota$ ) [151]. All these findings point in the direction of improved  
691 glycaemic control. PKB, also known as Akt, plays an important role in the PI3K/Akt pathway  
692 downstream of the IR, as mentioned before in this review [23, 27, 126]. PKA, on the other hand, is  
693 essential for the regulation of metabolism and triglyceride storage [152, 153], while PKC- $\iota$  is known to  
694 cause metabolic abnormalities in T2DM [154, 155]. GLP-1R, the main focus of this study, is a main  
695 receptor involved in T2DM. It is responsible for lowering blood glucose levels by, among other things,  
696 stimulating insulin secretion and suppressing glucagon secretion [156]. In addition, GLP-1R has been  
697 suggested to play a neuroprotective role in diabetes-related neurodegeneration by increasing insulin  
698 sensitivity [157]. Moreover, a different study has shown that recombinant human GLP-1 can reduce  
699 oxidative stress by activating PKA, which was found to be elevated in the study of Park et al. (2019),  
700 and by inhibiting PKC, which was found to be decreased, ultimately reversing diabetic nephropathy  
701 [158]. The increase in GLP-1 mRNA found by Park et al. (2019) thus indicates decreased oxidative stress  
702 and increased insulin sensitivity in the T2DM rats after resistance exercise training.

703

### 704 3.2.9 Mitochondrial function

705

706 Mitochondrial dysfunction is an important contributor to T2DM pathology [159, 160]. Multiple studies  
707 have already demonstrated mitochondrial dysfunction in the T2DM brain, where it contributes to  
708 neurodegeneration and cognitive dysfunction [161, 162]. It is also known that exercise positively  
709 influences mitochondrial function [163-165]. Studies show that exercise can restore mitochondrial





#### 738 4. Discussion

739 In the systematic part of this review, 24 studies investigating the effect of exercise training on cognition  
740 in T2DM were included. Although mixed results were found, most studies (20 out of 24) demonstrated  
741 a significant positive effect of exercise training on cognition, which is consistent with findings of  
742 previous reviews on this topic [65, 67]. 7 out of 10 studies investigating the effect of endurance  
743 exercise training were able to show cognitive improvement, indicating the effectiveness of this training  
744 modality. Even endurance exercise as simple as walking showed to already be successful in improving  
745 cognition in T2DM. Out of the two studies investigating the effect of resistance exercise on cognition  
746 in T2DM, one study failed to show cognitive improvement. This lack of effect could be attributed to  
747 the lower intensity or lack of weights in this exercise intervention, although an effect was observed in  
748 the sham low-intensity group of the study by Zhao et al. (2022), where also no added weights were  
749 used. Additional studies are required to clarify this. Studies comparing endurance exercise training to  
750 resistance exercise training found similar results for both exercise forms. Consequently, exercise  
751 interventions in T2DM patients aimed at improving cognition do not have to be limited to one type of  
752 exercise, and can be adapted to the patient's capacities. In addition, all included studies investigating  
753 the effect of combined (endurance + resistance (+ flexibility/balance)) exercise training were able to  
754 show significant cognitive improvements. Being in line with the exercise recommendations of the  
755 American College of Sports Medicine for older adults [171], this finding favours combined exercise to  
756 reach cognitive improvement in T2DM. Finally, tai chi chuan and Kaimai style Qigong showed to  
757 improve cognition in T2DM. The beneficial effect of these exercise forms might be attributed to the  
758 fact that they are motorically more complex, and require a more extensive involvement of the mind.

759 Based on this review, one can thus conclude that both endurance and resistance exercise training, as  
760 well as exercise training involving the mind, are effective at improving cognition in T2DM. Combined  
761 exercise training is presumably most desirable, although studies comparing combined exercise training  
762 to endurance or resistance exercise training alone are lacking. It also seems that a minimal intensity is  
763 required in resistance exercise training to elicit significant improvements. However, because no studies  
764 directly compare the effect of different exercise training intensities on cognition in T2DM, the optimal  
765 exercise intensity for cognitive improvement in T2DM is yet to be determined.

766 The mechanisms underlying cognitive improvement following exercise in T2DM have been explored in  
767 the second, narrative part of this review. Both the AMPK/Sirt1 pathway and PI3K/Akt/mTOR pathway  
768 have been identified as key players. The studies included in this review show that exercise-mediated  
769 activation of these pathways leads to beneficial brain changes in T2DM, such as increased  
770 neuroplasticity, brain volume, synaptic plasticity, dendritic spines, insulin sensitivity, mitochondrial  
771 remodelling and biogenesis, and ATP production, as well as decreased inflammation, oxidative stress,  
772 and amyloid  $\beta$  and p-tau production. BDNF, lactate, leptin, adiponectin, GSK3 $\beta$  and GLP-1 were  
773 identified as the most important factors mediating these changes. Although other factors such as IGF-  
774 1 have been suggested to play a role in the positive effect of exercise on cognition [172], no studies in  
775 T2DM have directly demonstrated this. Much more research is needed to identify the full spectrum of  
776 involved mediators and pathways, investigate interactions between different cell types, etc. In  
777 addition, it needs to be considered that the majority of the studies described in this review were  
778 conducted in rodents, and are yet to be confirmed in humans.

779 This review has various limitations that could interfere with the reliable interpretation of its findings.  
780 First of all, the fact that the studies included in this review use a variety of cognitive tests, makes it  
781 difficult to compare the different studies. Moreover, several studies merely use the MMSE or MoCA  
782 to test cognition, which are diagnostic tools designed to screen for MCI, and not to detect (subtle)  
783 changes in cognition [87, 88]. There is a need for a standardised cognitive test battery in T2DM to



784 increase the comparability of future studies and draw more reliable conclusions. In addition, the age,  
785 medication use, and ethnicity of the patient population varied across studies. Since cognition is heavily  
786 influenced by age [173], and medication use [174, 175] and genetics [61] strongly affect the response  
787 to exercise, comparability of the included studies may have been limited by these inconsistencies.  
788 Regarding the narrative part of this review, an important limitation is that only studies directly  
789 demonstrating an involvement of certain mediators in the effect of exercise training on the brain in  
790 T2DM have been considered. This means the present review is a non-exhaustive presentation of the  
791 involved mediators and pathways. Finally, publication bias might have skewed the results of this review  
792 towards a positive effect of exercise on cognition in T2DM.

793 In order to define an exercise program that is specifically tailored to cognitive improvement in T2DM,  
794 future studies should directly compare exercise of different intensities and volumes, as well as  
795 different exercise modalities. In addition, as already mentioned, a standardised cognitive test should  
796 be used that is most sensitive to picking up exercise-induced cognitive changes in T2DM. Furthermore,  
797 medication use, disease stage, age, and genetics should be taken into account.

## 798 **5. Conclusion**

799 Overall, it can be concluded that exercise has a positive influence on cognition and brain structure in  
800 T2DM. There are few studies that fail to find a positive correlation between exercise training and  
801 cognition in T2DM, which can often be attributed to a small sample size or exercise of too low intensity.  
802 From this review, we can assume that resistance and endurance exercise training have similar effects  
803 on cognition in T2DM, and that unconventional exercise training involving the mind, such as tai chi, is  
804 also capable of inducing cognitive improvements. However, since there is a lack of studies directly  
805 comparing different exercise intensities, little can be said about which exercise intensity would elicit  
806 the best cognitive results in T2DM. Future studies should look into this in order to make exercise  
807 programs for cognitive preservation in T2DM patients as targeted and efficient as possible.

## 808 **6. Declarations**

### 809 Author contributions

810 Jitske Vandersmissen conducted the literature search and wrote the manuscript. Dominique Hansen,  
811 Koen Cuypers, and Ilse Dewachter revised the manuscript and provided feedback.

### 812 Competing interests

813 The authors confirm that there were no conflicts of interest.

814 The authors have no relevant financial or non-financial interests to disclose.

### 815 Funding

816 Internal funding of Hasselt University (23OWB01BOF) was received to assist with the preparation of  
817 this manuscript.

## 818 **7. References**

- 820
- 821 1. Harman, M.F. and M.G. Martin, *Epigenetic mechanisms related to cognitive decline during*  
822 *aging*. J Neurosci Res, 2020. **98**(2): p. 234-246.
  - 823 2. Yang, Y., et al., *Cognitive Decline Associated with Aging*. Adv Exp Med Biol, 2023. **1419**: p. 25-  
824 46.

- 825 3. Grimm, A. and A. Eckert, *Brain aging and neurodegeneration: from a mitochondrial point of*  
826 *view*. J Neurochem, 2017. **143**(4): p. 418-431.
- 827 4. Todorova, V. and A. Blokland, *Mitochondria and Synaptic Plasticity in the Mature and Aging*  
828 *Nervous System*. Curr Neuropharmacol, 2017. **15**(1): p. 166-173.
- 829 5. Bergado, J.A. and W. Almaguer, *Aging and synaptic plasticity: a review*. Neural Plast, 2002.  
830 **9**(4): p. 217-32.
- 831 6. Harada, C.N., M.C. Natelson Love, and K.L. Triebel, *Normal cognitive aging*. Clin Geriatr Med,  
832 2013. **29**(4): p. 737-52.
- 833 7. Oswald, J., et al., *Brain structure and cognitive ability in healthy aging: a review on*  
834 *longitudinal correlated change*. Rev Neurosci, 2019. **31**(1): p. 1-57.
- 835 8. Blinkouskaya, Y., et al., *Brain aging mechanisms with mechanical manifestations*. Mech  
836 Ageing Dev, 2021. **200**: p. 111575.
- 837 9. Geula, C., et al., *Aging renders the brain vulnerable to amyloid beta-protein neurotoxicity*. Nat  
838 Med, 1998. **4**(7): p. 827-31.
- 839 10. Dickstein, D.L., et al., *Dendritic spine changes associated with normal aging*. Neuroscience,  
840 2013. **251**: p. 21-32.
- 841 11. Antal, B., et al., *Type 2 diabetes mellitus accelerates brain aging and cognitive decline:*  
842 *Complementary findings from UK Biobank and meta-analyses*. Elife, 2022. **11**.
- 843 12. Malik, A., et al., *Cognitive Impairment in Type 2 Diabetes Mellitus*. Cureus, 2022. **14**(2): p.  
844 e22193.
- 845 13. Roy, S., et al., *Cognitive Function and Control of Type 2 Diabetes Mellitus in Young Adults*. N  
846 Am J Med Sci, 2015. **7**(5): p. 220-6.
- 847 14. Zilliox, L.A., et al., *Diabetes and Cognitive Impairment*. Curr Diab Rep, 2016. **16**(9): p. 87.
- 848 15. Biessels, G.J., et al., *Dementia and cognitive decline in type 2 diabetes and prediabetic stages:*  
849 *towards targeted interventions*. Lancet Diabetes Endocrinol, 2014. **2**(3): p. 246-55.
- 850 16. Chakraborty, A., et al., *Age Related Prevalence of Mild Cognitive Impairment in Type 2*  
851 *Diabetes Mellitus Patients in the Indian Population and Association of Serum Lipids With*  
852 *Cognitive Dysfunction*. Front Endocrinol (Lausanne), 2021. **12**: p. 798652.
- 853 17. Cheng, G., et al., *Diabetes as a risk factor for dementia and mild cognitive impairment: a*  
854 *meta-analysis of longitudinal studies*. Intern Med J, 2012. **42**(5): p. 484-91.
- 855 18. Sato, N. and R. Morishita, *Brain alterations and clinical symptoms of dementia in diabetes:*  
856 *abeta/tau-dependent and independent mechanisms*. Front Endocrinol (Lausanne), 2014. **5**: p.  
857 143.
- 858 19. Karvani, M., et al., *Neurocognitive impairment in type 2 diabetes mellitus*. Hormones  
859 (Athens), 2019. **18**(4): p. 523-534.
- 860 20. Li, Z.Y., et al., *Changes of brain function in patients with type 2 diabetes mellitus measured by*  
861 *different analysis methods: A new coordinate-based meta-analysis of neuroimaging*. Front  
862 Neurol, 2022. **13**: p. 923310.
- 863 21. Liu, J., et al., *Reduced Gray Matter Volume in Patients with Type 2 Diabetes Mellitus*. Front  
864 Aging Neurosci, 2017. **9**: p. 161.
- 865 22. Cui, Y., et al., *Aberrant functional connectivity of default-mode network in type 2 diabetes*  
866 *patients*. Eur Radiol, 2015. **25**(11): p. 3238-46.
- 867 23. Tumminia, A., et al., *Type 2 Diabetes Mellitus and Alzheimer's Disease: Role of Insulin*  
868 *Signalling and Therapeutic Implications*. Int J Mol Sci, 2018. **19**(11).
- 869 24. Michailidis, M., et al., *Alzheimer's Disease as Type 3 Diabetes: Common Pathophysiological*  
870 *Mechanisms between Alzheimer's Disease and Type 2 Diabetes*. Int J Mol Sci, 2022. **23**(5).
- 871 25. Steen, E., et al., *Impaired insulin and insulin-like growth factor expression and signaling*  
872 *mechanisms in Alzheimer's disease--is this type 3 diabetes?* J Alzheimers Dis, 2005. **7**(1): p.  
873 63-80.
- 874 26. Femminella, G.D., et al., *Antidiabetic Drugs in Alzheimer's Disease: Mechanisms of Action and*  
875 *Future Perspectives*. J Diabetes Res, 2017. **2017**: p. 7420796.

- 876 27. Blazquez, E., et al., *Insulin in the brain: its pathophysiological implications for States related*  
877 *with central insulin resistance, type 2 diabetes and Alzheimer's disease*. Front Endocrinol  
878 (Lausanne), 2014. **5**: p. 161.
- 879 28. Hooper, C., R. Killick, and S. Lovestone, *The GSK3 hypothesis of Alzheimer's disease*. J  
880 Neurochem, 2008. **104**(6): p. 1433-9.
- 881 29. Talbot, K., et al., *Demonstrated brain insulin resistance in Alzheimer's disease patients is*  
882 *associated with IGF-1 resistance, IRS-1 dysregulation, and cognitive decline*. J Clin Invest,  
883 2012. **122**(4): p. 1316-38.
- 884 30. Farris, W., et al., *Insulin-degrading enzyme regulates the levels of insulin, amyloid beta-*  
885 *protein, and the beta-amyloid precursor protein intracellular domain in vivo*. Proc Natl Acad  
886 Sci U S A, 2003. **100**(7): p. 4162-7.
- 887 31. Sousa, L., et al., *Insulin-degrading enzyme: an ally against metabolic and neurodegenerative*  
888 *diseases*. J Pathol, 2021. **255**(4): p. 346-361.
- 889 32. Song, D. and D.S.F. Yu, *Effects of a moderate-intensity aerobic exercise programme on the*  
890 *cognitive function and quality of life of community-dwelling elderly people with mild cognitive*  
891 *impairment: A randomised controlled trial*. Int J Nurs Stud, 2019. **93**: p. 97-105.
- 892 33. Baker, L.D., et al., *Effects of aerobic exercise on mild cognitive impairment: a controlled trial*.  
893 Arch Neurol, 2010. **67**(1): p. 71-9.
- 894 34. Gomez-Pinilla, F. and C. Hillman, *The influence of exercise on cognitive abilities*. Compr  
895 Physiol, 2013. **3**(1): p. 403-28.
- 896 35. Lu, Y., et al., *Treadmill Exercise Exerts Neuroprotection and Regulates Microglial Polarization*  
897 *and Oxidative Stress in a Streptozotocin-Induced Rat Model of Sporadic Alzheimer's Disease*. J  
898 Alzheimers Dis, 2017. **56**(4): p. 1469-1484.
- 899 36. Wang, R. and R.M.D. Holsinger, *Exercise-induced brain-derived neurotrophic factor*  
900 *expression: Therapeutic implications for Alzheimer's dementia*. Ageing Res Rev, 2018. **48**: p.  
901 109-121.
- 902 37. Izquierdo, M., et al., *Cytokine and hormone responses to resistance training*. Eur J Appl  
903 Physiol, 2009. **107**(4): p. 397-409.
- 904 38. de Sousa, C.V., et al., *The Antioxidant Effect of Exercise: A Systematic Review and Meta-*  
905 *Analysis*. Sports Med, 2017. **47**(2): p. 277-293.
- 906 39. Demnitz, N., et al., *Hippocampal maintenance after a 12-month physical activity intervention*  
907 *in older adults: The REACT MRI study*. Neuroimage Clin, 2022. **35**: p. 102762.
- 908 40. ten Brinke, L.F., et al., *Aerobic exercise increases hippocampal volume in older women with*  
909 *probable mild cognitive impairment: a 6-month randomised controlled trial*. Br J Sports Med,  
910 2015. **49**(4): p. 248-54.
- 911 41. Morris, J.K., et al., *Aerobic exercise for Alzheimer's disease: A randomized controlled pilot*  
912 *trial*. PLoS One, 2017. **12**(2): p. e0170547.
- 913 42. Choi, S.H., et al., *Combined adult neurogenesis and BDNF mimic exercise effects on cognition*  
914 *in an Alzheimer's mouse model*. Science, 2018. **361**(6406).
- 915 43. Erickson, K.I., et al., *Exercise training increases size of hippocampus and improves memory*.  
916 Proc Natl Acad Sci U S A, 2011. **108**(7): p. 3017-22.
- 917 44. Burns, J.M., et al., *Cardiorespiratory fitness and brain atrophy in early Alzheimer disease*.  
918 Neurology, 2008. **71**(3): p. 210-6.
- 919 45. Lautenschlager, N.T., et al., *Effect of physical activity on cognitive function in older adults at*  
920 *risk for Alzheimer disease: a randomized trial*. JAMA, 2008. **300**(9): p. 1027-37.
- 921 46. Buchman, A.S., et al., *Total daily physical activity and the risk of AD and cognitive decline in*  
922 *older adults*. Neurology, 2012. **78**(17): p. 1323-9.
- 923 47. Xu, L., et al., *Brain metabolism in Alzheimer's disease: biological mechanisms of exercise*.  
924 Transl Neurodegener, 2023. **12**(1): p. 33.
- 925 48. Yang, J., et al., *Lactate promotes plasticity gene expression by potentiating NMDA signaling in*  
926 *neurons*. Proc Natl Acad Sci U S A, 2014. **111**(33): p. 12228-33.

- 927 49. El Hayek, L., et al., *Lactate Mediates the Effects of Exercise on Learning and Memory through*  
928 *SIRT1-Dependent Activation of Hippocampal Brain-Derived Neurotrophic Factor (BDNF)*. J  
929 Neurosci, 2019. **39**(13): p. 2369-2382.
- 930 50. Brinkmann, C., et al., *Effects of Cycling and Exergaming on Neurotrophic Factors in Elderly*  
931 *Type 2 Diabetic Men - A Preliminary Investigation*. Exp Clin Endocrinol Diabetes, 2017. **125**(7):  
932 p. 436-440.
- 933 51. Morland, C., et al., *Exercise induces cerebral VEGF and angiogenesis via the lactate receptor*  
934 *HCAR1*. Nat Commun, 2017. **8**: p. 15557.
- 935 52. Morland, C., et al., *The lactate receptor, G-protein-coupled receptor 81/hydroxycarboxylic*  
936 *acid receptor 1: Expression and action in brain*. J Neurosci Res, 2015. **93**(7): p. 1045-55.
- 937 53. Lourenco, M.V., et al., *Exercise-linked FND5/irisin rescues synaptic plasticity and memory*  
938 *defects in Alzheimer's models*. Nat Med, 2019. **25**(1): p. 165-175.
- 939 54. Gokce, E. and N. Gun, *The Relationship Between Exercise, Cathepsin B, and Cognitive*  
940 *Functions: Systematic Review*. Percept Mot Skills, 2023. **130**(4): p. 1366-1385.
- 941 55. Huang, B., K. Chen, and Y. Li, *Aerobic exercise, an effective prevention and treatment for mild*  
942 *cognitive impairment*. Front Aging Neurosci, 2023. **15**: p. 1194559.
- 943 56. Moon, H.Y., et al., *Running-Induced Systemic Cathepsin B Secretion Is Associated with*  
944 *Memory Function*. Cell Metab, 2016. **24**(2): p. 332-40.
- 945 57. Madarshahian, F., M. Hassanabadi, and M. Koshniat Nikoo, *Cognitive status and foot self care*  
946 *practice in overweight diabetics, engaged in different levels of physical activity*. J Diabetes  
947 Metab Disord, 2014. **13**(1): p. 31.
- 948 58. Rabinowitz, Y., et al., *Physical Activity Is Associated with Slower Cognitive Decline in Older*  
949 *Adults with Type 2 Diabetes*. J Prev Alzheimers Dis, 2023. **10**(3): p. 497-502.
- 950 59. Zabetian-Targhi, F., et al., *The Association Between Physical Activity Intensity, Cognition, and*  
951 *Brain Structure in People With Type 2 Diabetes*. J Gerontol A Biol Sci Med Sci, 2021. **76**(11): p.  
952 2047-2053.
- 953 60. Shih, I.F., et al., *Physical activity modifies the influence of apolipoprotein E epsilon4 allele and*  
954 *type 2 diabetes on dementia and cognitive impairment among older Mexican Americans*.  
955 Alzheimers Dement, 2018. **14**(1): p. 1-9.
- 956 61. Liu, T., et al., *The Influence of the BDNF Val66Met Polymorphism on the Association of*  
957 *Regular Physical Activity With Cognition Among Individuals With Diabetes*. Biol Res Nurs,  
958 2021. **23**(3): p. 318-330.
- 959 62. Silveira-Rodrigues, J.G., et al., *Acute bouts of aerobic and resistance exercise similarly alter*  
960 *inhibitory control and response time while inversely modifying plasma BDNF concentrations*  
961 *in middle-aged and older adults with type 2 diabetes*. Exp Brain Res, 2023. **241**(4): p. 1173-  
962 1183.
- 963 63. Wang, H., W. Tang, and Y. Zhao, *Acute effects of different exercise forms on executive*  
964 *function and the mechanism of cerebral hemodynamics in hospitalized T2DM patients: a*  
965 *within-subject study*. Front Public Health, 2023. **11**: p. 1165892.
- 966 64. Zhao, R.R., A.J. O'Sullivan, and M.A. Fiatarone Singh, *Exercise or physical activity and*  
967 *cognitive function in adults with type 2 diabetes, insulin resistance or impaired glucose*  
968 *tolerance: a systematic review*. Eur Rev Aging Phys Act, 2018. **15**: p. 1.
- 969 65. Wang, R., et al., *The effect of physical activity interventions on cognition function in patients*  
970 *with diabetes: A systematic review and meta-analysis*. Diabetes Metab Res Rev, 2021. **37**(7):  
971 p. e3443.
- 972 66. Cooke, S., et al., *Effects of exercise, cognitive, and dual-task interventions on cognition in type*  
973 *2 diabetes mellitus: A systematic review and meta-analysis*. PLoS One, 2020. **15**(5): p.  
974 e0232958.
- 975 67. Cai, Y.H., et al., *Effect of Exercise on the Cognitive Function of Older Patients With Type 2*  
976 *Diabetes Mellitus: A Systematic Review and Meta-Analysis*. Front Hum Neurosci, 2022. **16**: p.  
977 876935.



- 978 68. Dyer, A.H., et al., *Non-pharmacological interventions for cognition in patients with Type 2*  
979 *diabetes mellitus: a systematic review*. QJM, 2020. **113**(3): p. 155-161.
- 980 69. Callisaya, M. and K. Nosaka, *Effects of Exercise on Type 2 Diabetes Mellitus-Related Cognitive*  
981 *Impairment and Dementia*. J Alzheimers Dis, 2017. **59**(2): p. 503-513.
- 982 70. Yi, S.S., *Effects of exercise on brain functions in diabetic animal models*. World J Diabetes,  
983 2015. **6**(4): p. 583-97.
- 984 71. Bertram, S., K. Brixius, and C. Brinkmann, *Exercise for the diabetic brain: how physical*  
985 *training may help prevent dementia and Alzheimer's disease in T2DM patients*. Endocrine,  
986 2016. **53**(2): p. 350-63.
- 987 72. Podolski, N., et al., *Effects of Regular Physical Activity on the Cognitive Performance of Type 2*  
988 *Diabetic Patients: A Systematic Review*. Metab Syndr Relat Disord, 2017. **15**(10): p. 481-493.
- 989 73. Maher, C.G., et al., *Reliability of the PEDro scale for rating quality of randomized controlled*  
990 *trials*. Phys Ther, 2003. **83**(8): p. 713-21.
- 991 74. Macleod, M.R., et al., *Pooling of animal experimental data reveals influence of study design*  
992 *and publication bias*. Stroke, 2004. **35**(5): p. 1203-8.
- 993 75. Leischik, R., et al., *Exercise Improves Cognitive Function-A Randomized Trial on the Effects of*  
994 *Physical Activity on Cognition in Type 2 Diabetes Patients*. J Pers Med, 2021. **11**(6).
- 995 76. Ploydang, T., et al., *Nordic Walking in Water on Cerebrovascular Reactivity and Cognitive*  
996 *Function in Elderly Patients with Type 2 Diabetes*. Med Sci Sports Exerc, 2023.
- 997 77. Baker, L.D., et al., *Aerobic exercise improves cognition for older adults with glucose*  
998 *intolerance, a risk factor for Alzheimer's disease*. J Alzheimers Dis, 2010. **22**(2): p. 569-79.
- 999 78. Anderson-Hanley, C., et al., *Neuropsychological benefits of stationary bike exercise and a*  
1000 *cybercycle exergame for older adults with diabetes: an exploratory analysis*. J Diabetes Sci  
1001 Technol, 2012. **6**(4): p. 849-57.
- 1002 79. Wang, Y., et al., *Aerobic Training Increases Hippocampal Volume and Protects Cognitive*  
1003 *Function for Type 2 Diabetes Patients with Normal Cognition*. Exp Clin Endocrinol Diabetes,  
1004 2023.
- 1005 80. Shekarchian, M., M. Peeri, and M.A. Azarbayjani, *Physical activity in a swimming pool*  
1006 *attenuates memory impairment by reducing glutamate and inflammatory cytokines and*  
1007 *increasing BDNF in the brain of mice with type 2 diabetes*. Brain Res Bull, 2023. **201**: p.  
1008 110725.
- 1009 81. Parsa, H., et al., *Swimming training and Plantago psyllium ameliorate cognitive impairment*  
1010 *and glucose tolerance in streptozotocin-nicotinamide-induced type 2 diabetic rats*. J Physiol  
1011 Sci, 2021. **71**(1): p. 37.
- 1012 82. Vorhees, C.V. and M.T. Williams, *Morris water maze: procedures for assessing spatial and*  
1013 *related forms of learning and memory*. Nat Protoc, 2006. **1**(2): p. 848-58.
- 1014 83. Jesmin, S., et al., *Long-term light and moderate exercise intervention similarly prevent both*  
1015 *hippocampal and glycemic dysfunction in presymptomatic type 2 diabetic rats*. Am J Physiol  
1016 Endocrinol Metab, 2022. **322**(3): p. E219-E230.
- 1017 84. Lang, X., et al., *Treadmill exercise mitigates neuroinflammation and increases BDNF via*  
1018 *activation of SIRT1 signaling in a mouse model of T2DM*. Brain Res Bull, 2020. **165**: p. 30-39.
- 1019 85. Shima, T., et al., *Moderate exercise ameliorates dysregulated hippocampal glycometabolism*  
1020 *and memory function in a rat model of type 2 diabetes*. Diabetologia, 2017. **60**(3): p. 597-606.
- 1021 86. Shima, T., et al., *Light-intensity exercise improves memory dysfunction with the restoration of*  
1022 *hippocampal MCT2 and miRNAs in type 2 diabetic mice*. Metab Brain Dis, 2023. **38**(1): p. 245-  
1023 254.
- 1024 87. Nasreddine, Z.S., et al., *The Montreal Cognitive Assessment, MoCA: a brief screening tool for*  
1025 *mild cognitive impairment*. J Am Geriatr Soc, 2005. **53**(4): p. 695-9.
- 1026 88. Arevalo-Rodriguez, I., et al., *Mini-Mental State Examination (MMSE) for the early detection of*  
1027 *dementia in people with mild cognitive impairment (MCI)*. Cochrane Database Syst Rev, 2021.  
1028 **7**(7): p. CD010783.

- 1029 89. Zhao, R.R., et al., *Effect of High-Intensity Power Training on Cognitive Function in Older Adults*  
1030 *With Type 2 Diabetes: Secondary Outcomes of the GREAT2DO Study*. J Gerontol A Biol Sci  
1031 Med Sci, 2022. **77**(10): p. 1975-1985.
- 1032 90. Yamamoto, Y., et al., *Effects of resistance training using elastic bands on muscle strength with*  
1033 *or without a leucine supplement for 48 weeks in elderly patients with type 2 diabetes*. Endocr  
1034 J, 2021. **68**(3): p. 291-298.
- 1035 91. Teixeira, R.B., et al., *Evaluating the effects of exercise on cognitive function in hypertensive*  
1036 *and diabetic patients using the mental test and training system*. World J Biol Psychiatry,  
1037 2019. **20**(3): p. 209-218.
- 1038 92. Silveira-Rodrigues, J.G., et al., *Combined exercise training improves specific domains of*  
1039 *cognitive functions and metabolic markers in middle-aged and older adults with type 2*  
1040 *diabetes mellitus*. Diabetes Res Clin Pract, 2021. **173**: p. 108700.
- 1041 93. Silveira-Rodrigues, J.G., et al., *Combined Training Improves Executive Functions Without*  
1042 *Changing Brain-Derived Neurotrophic Factor Levels of Middle-Aged and Older Adults with*  
1043 *Type 2 Diabetes*. Exp Clin Endocrinol Diabetes, 2023. **131**(6): p. 345-353.
- 1044 94. Espeland, M.A., et al., *Effects of Physical Activity Intervention on Physical and Cognitive*  
1045 *Function in Sedentary Adults With and Without Diabetes*. J Gerontol A Biol Sci Med Sci, 2017.  
1046 **72**(6): p. 861-866.
- 1047 95. Ghodrati, N., et al., *Effect of Combined Exercise Training on Physical and Cognitive Function in*  
1048 *Women With Type 2 Diabetes*. Can J Diabetes, 2023. **47**(2): p. 162-170.
- 1049 96. Martinez-Velilla, N., et al., *Effects of a Tailored Exercise Intervention in Acutely Hospitalized*  
1050 *Oldest Old Diabetic Adults: An Ancillary Analysis*. J Clin Endocrinol Metab, 2021. **106**(2): p.  
1051 e899-e906.
- 1052 97. Callisaya, M.L., et al., *Feasibility of a multi-modal exercise program on cognition in older*  
1053 *adults with Type 2 diabetes - a pilot randomised controlled trial*. BMC Geriatr, 2017. **17**(1): p.  
1054 237.
- 1055 98. Ghahfarrokhi, M.M., et al., *Feasibility and preliminary efficacy of different intensities of*  
1056 *functional training in elderly type 2 diabetes patients with cognitive impairment: a pilot*  
1057 *randomised controlled trial*. BMC Geriatr, 2024. **24**(1): p. 71.
- 1058 99. Chen, Y., et al., *Effects of Tai Chi Chuan on Cognitive Function in Adults 60 Years or Older With*  
1059 *Type 2 Diabetes and Mild Cognitive Impairment in China: A Randomized Clinical Trial*. JAMA  
1060 Netw Open, 2023. **6**(4): p. e237004.
- 1061 100. Cai, H., et al., *Effect of Low-Intensity, Kinect-Based Kaimai-Style Qigong Exercise in Older*  
1062 *Adults With Type 2 Diabetes*. J Gerontol Nurs, 2019. **45**(2): p. 42-52.
- 1063 101. Li, X., et al., *Effects of fitness qigong and tai chi on middle-aged and elderly patients with type*  
1064 *2 diabetes mellitus*. PLoS One, 2020. **15**(12): p. e0243989.
- 1065 102. Coelho Junior, H.J., et al., *Multicomponent Exercise Improves Hemodynamic Parameters and*  
1066 *Mobility, but Not Maximal Walking Speed, Transfer Capacity, and Executive Function of Older*  
1067 *Type II Diabetic Patients*. Biomed Res Int, 2018. **2018**: p. 4832851.
- 1068 103. Shellington, E.M., et al., *Results From a Feasibility Study of Square-Stepping Exercise in Older*  
1069 *Adults With Type 2 Diabetes and Self-Reported Cognitive Complaints to Improve Global*  
1070 *Cognitive Functioning*. Can J Diabetes, 2018. **42**(6): p. 603-612 e1.
- 1071 104. Stanciu, G.D., et al., *Link Between Diabetes and Alzheimer's Disease due to the Shared*  
1072 *Amyloid Aggregation and Deposition Involving both Neurodegenerative Changes and*  
1073 *Neurovascular Damages*. J Clin Med, 2020. **9**(6).
- 1074 105. Li, L. and C. Holscher, *Common pathological processes in Alzheimer disease and type 2*  
1075 *diabetes: a review*. Brain Res Rev, 2007. **56**(2): p. 384-402.
- 1076 106. He, X.F., et al., *Voluntary Exercise Promotes Glymphatic Clearance of Amyloid Beta and*  
1077 *Reduces the Activation of Astrocytes and Microglia in Aged Mice*. Front Mol Neurosci, 2017.  
1078 **10**: p. 144.

- 1079 107. Xu, L., et al., *Treadmill exercise promotes E3 ubiquitin ligase to remove amyloid beta and P-*  
1080 *tau and improve cognitive ability in APP/PS1 transgenic mice.* J Neuroinflammation, 2022.  
1081 **19**(1): p. 243.
- 1082 108. Marwarha, G. and O. Ghribi, *Leptin signaling and Alzheimer's disease.* Am J Neurodegener  
1083 Dis, 2012. **1**(3): p. 245-65.
- 1084 109. Marwarha, G., et al., *Leptin attenuates BACE1 expression and amyloid-beta genesis via the*  
1085 *activation of SIRT1 signaling pathway.* Biochim Biophys Acta, 2014. **1842**(9): p. 1587-95.
- 1086 110. Rezaei, M.H., et al., *Leptin Signaling Could Mediate Hippocampal Decumulation of Beta-*  
1087 *Amyloid and Tau Induced by High-Intensity Interval Training in Rats with Type 2 Diabetes.* Cell  
1088 Mol Neurobiol, 2023.
- 1089 111. De Sousa, R.A.L., et al., *High-intensity resistance training induces changes in cognitive*  
1090 *function, but not in locomotor activity or anxious behavior in rats induced to type 2 diabetes.*  
1091 *Physiol Behav*, 2020. **223**: p. 112998.
- 1092 112. Fang, X., et al., *Phosphorylation and inactivation of glycogen synthase kinase 3 by protein*  
1093 *kinase A.* Proc Natl Acad Sci U S A, 2000. **97**(22): p. 11960-5.
- 1094 113. Hernandez, F., J.J. Lucas, and J. Avila, *GSK3 and tau: two convergence points in Alzheimer's*  
1095 *disease.* J Alzheimers Dis, 2013. **33 Suppl 1**: p. S141-4.
- 1096 114. Rolev, K.D., X.S. Shu, and Y. Ying, *Targeted pharmacotherapy against neurodegeneration and*  
1097 *neuroinflammation in early diabetic retinopathy.* Neuropharmacology, 2021. **187**: p. 108498.
- 1098 115. Pousti, F., et al., *Adiponectin modulates synaptic plasticity in hippocampal dentate gyrus.*  
1099 *Neurosci Lett*, 2018. **662**: p. 227-232.
- 1100 116. Weisz, F., et al., *The role of adiponectin receptors in the regulation of synaptic transmission in*  
1101 *the hippocampus.* Synapse, 2017. **71**(5).
- 1102 117. Ng, R.C., et al., *Chronic adiponectin deficiency leads to Alzheimer's disease-like cognitive*  
1103 *impairments and pathologies through AMPK inactivation and cerebral insulin resistance in*  
1104 *aged mice.* Mol Neurodegener, 2016. **11**(1): p. 71.
- 1105 118. Jian, M., et al., *Adiponectin suppresses amyloid-beta oligomer (A $\beta$ O)-induced*  
1106 *inflammatory response of microglia via AdipoR1-AMPK-NF- $\kappa$ B signaling pathway.* J  
1107 Neuroinflammation, 2019. **16**(1): p. 110.
- 1108 119. Mehta, B.K., K.K. Singh, and S. Banerjee, *Effect of exercise on type 2 diabetes-associated*  
1109 *cognitive impairment in rats.* Int J Neurosci, 2019. **129**(3): p. 252-263.
- 1110 120. Colucci-D'Amato, L., L. Speranza, and F. Volpicelli, *Neurotrophic Factor BDNF, Physiological*  
1111 *Functions and Therapeutic Potential in Depression, Neurodegeneration and Brain Cancer.* Int J  
1112 Mol Sci, 2020. **21**(20).
- 1113 121. Jamali, A., S. Shahrbanian, and S. Morteza Tayebi, *The Effects of Exercise Training on the*  
1114 *Brain-Derived Neurotrophic Factor (BDNF) in the Patients with Type 2 Diabetes: A Systematic*  
1115 *Review of the Randomized Controlled Trials.* J Diabetes Metab Disord, 2020. **19**(1): p. 633-  
1116 643.
- 1117 122. Cheng, S.M. and S.D. Lee, *Exercise Training Enhances BDNF/TrkB Signaling Pathway and*  
1118 *Inhibits Apoptosis in Diabetic Cerebral Cortex.* Int J Mol Sci, 2022. **23**(12).
- 1119 123. Hwang, I.K., et al., *Effects of age and treadmill exercise in chronic diabetic stages on*  
1120 *neuroblast differentiation in a rat model of type 2 diabetes.* Brain Res, 2010. **1341**: p. 63-71.
- 1121 124. Yi, S.S., et al., *Effects of treadmill exercise on cell proliferation and differentiation in the*  
1122 *subgranular zone of the dentate gyrus in a rat model of type II diabetes.* Neurochem Res,  
1123 2009. **34**(6): p. 1039-46.
- 1124 125. Stranahan, A.M., et al., *Voluntary exercise and caloric restriction enhance hippocampal*  
1125 *dendritic spine density and BDNF levels in diabetic mice.* Hippocampus, 2009. **19**(10): p. 951-  
1126 61.
- 1127 126. Li, J., et al., *Mechanisms of Aerobic Exercise Upregulating the Expression of Hippocampal*  
1128 *Synaptic Plasticity-Associated Proteins in Diabetic Rats.* Neural Plast, 2019. **2019**: p. 7920540.

- 1129 127. Lee, C.C., C.C. Huang, and K.S. Hsu, *Insulin promotes dendritic spine and synapse formation by*  
1130 *the PI3K/Akt/mTOR and Rac1 signaling pathways*. *Neuropharmacology*, 2011. **61**(4): p. 867-  
1131 79.
- 1132 128. Barone, E., et al., *The interplay among oxidative stress, brain insulin resistance and AMPK*  
1133 *dysfunction contribute to neurodegeneration in type 2 diabetes and Alzheimer disease*. *Free*  
1134 *Radic Biol Med*, 2021. **176**: p. 16-33.
- 1135 129. Xu, J., et al., *Brain SIRT1 Mediates Metabolic Homeostasis and Neuroprotection*. *Front*  
1136 *Endocrinol (Lausanne)*, 2018. **9**: p. 702.
- 1137 130. Banerjee, J., A. Bruckbauer, and M.B. Zemel, *Activation of the AMPK/Sirt1 pathway by a*  
1138 *leucine-metformin combination increases insulin sensitivity in skeletal muscle, and stimulates*  
1139 *glucose and lipid metabolism and increases life span in Caenorhabditis elegans*. *Metabolism*,  
1140 2016. **65**(11): p. 1679-1691.
- 1141 131. Wang, R., et al., *Deciphering therapeutic options for neurodegenerative diseases: insights*  
1142 *from SIRT1*. *J Mol Med (Berl)*, 2022. **100**(4): p. 537-553.
- 1143 132. Lin, L., et al., *Aerobic Exercise Improves Type 2 Diabetes Mellitus-Related Cognitive*  
1144 *Impairment by Inhibiting JAK2/STAT3 and Enhancing AMPK/SIRT1 Pathways in Mice*. *Dis*  
1145 *Markers*, 2022. **2022**: p. 6010504.
- 1146 133. Yang, X., et al., *The diabetes medication canagliflozin promotes mitochondrial remodelling of*  
1147 *adipocyte via the AMPK-Sirt1-Pgc-1alpha signalling pathway*. *Adipocyte*, 2020. **9**(1): p. 484-  
1148 494.
- 1149 134. Wang, Q., et al., *Aerobic Exercise Improves Synaptic-Related Proteins of Diabetic Rats by*  
1150 *Inhibiting FOXO1/NF-kappaB/NLRP3 Inflammatory Signaling Pathway and Ameliorating*  
1151 *PI3K/Akt Insulin Signaling Pathway*. *J Mol Neurosci*, 2019. **69**(1): p. 28-38.
- 1152 135. Hemmings, B.A. and D.F. Restuccia, *PI3K-PKB/Akt pathway*. *Cold Spring Harb Perspect Biol*,  
1153 2012. **4**(9): p. a011189.
- 1154 136. Greene, W.C. and L.F. Chen, *Regulation of NF-kappaB action by reversible acetylation*.  
1155 *Novartis Found Symp*, 2004. **259**: p. 208-17; discussion 218-25.
- 1156 137. Zhao, F., M. Tomita, and A. Dutta, *Operational Modal Analysis of Near-Infrared Spectroscopy*  
1157 *Measure of 2-Month Exercise Intervention Effects in Sedentary Older Adults with Diabetes*  
1158 *and Cognitive Impairment*. *Brain Sci*, 2023. **13**(7).
- 1159 138. van Praag, H., et al., *Running enhances neurogenesis, learning, and long-term potentiation in*  
1160 *mice*. *Proc Natl Acad Sci U S A*, 1999. **96**(23): p. 13427-31.
- 1161 139. Matsui, T., et al., *Brain glycogen supercompensation following exhaustive exercise*. *J Physiol*,  
1162 2012. **590**(3): p. 607-16.
- 1163 140. Soya, M., et al., *Dysregulation of Glycogen Metabolism with Concomitant Spatial Memory*  
1164 *Dysfunction in Type 2 Diabetes: Potential Beneficial Effects of Chronic Exercise*. *Adv*  
1165 *Neurobiol*, 2019. **23**: p. 363-383.
- 1166 141. Karstoft, K. and B.K. Pedersen, *Exercise and type 2 diabetes: focus on metabolism and*  
1167 *inflammation*. *Immunol Cell Biol*, 2016. **94**(2): p. 146-50.
- 1168 142. Dutta, B.J., et al., *Inside the diabetic brain: Insulin resistance and molecular mechanism*  
1169 *associated with cognitive impairment and its possible therapeutic strategies*. *Pharmacol Res*,  
1170 2022. **182**: p. 106358.
- 1171 143. Arnold, S.E., et al., *Brain insulin resistance in type 2 diabetes and Alzheimer disease: concepts*  
1172 *and conundrums*. *Nat Rev Neurol*, 2018. **14**(3): p. 168-181.
- 1173 144. Zhao, H., et al., *Insulin Resistance Is a Risk Factor for Mild Cognitive Impairment in Elderly*  
1174 *Adults with T2DM*. *Open Life Sci*, 2019. **14**: p. 255-261.
- 1175 145. Kullmann, S., et al., *Exercise restores brain insulin sensitivity in sedentary adults who are*  
1176 *overweight and obese*. *JCI Insight*, 2022. **7**(18).
- 1177 146. Malin, S.K., et al., *Brain insulin resistance and cognitive function: influence of exercise*. *J Appl*  
1178 *Physiol (1985)*, 2022. **133**(6): p. 1368-1380.
- 1179 147. Li, H. and X. Yu, *Emerging role of JNK in insulin resistance*. *Curr Diabetes Rev*, 2013. **9**(5): p.  
1180 422-8.



- 1181 148. Sykiotis, G.P. and A.G. Papavassiliou, *Serine phosphorylation of insulin receptor substrate-1: a*  
1182 *novel target for the reversal of insulin resistance*. Mol Endocrinol, 2001. **15**(11): p. 1864-9.
- 1183 149. Tanti, J.F., et al., *Alteration in insulin action: role of IRS-1 serine phosphorylation in the*  
1184 *retroregulation of insulin signalling*. Ann Endocrinol (Paris), 2004. **65**(1): p. 43-8.
- 1185 150. Bevan, P., *Insulin signalling*. J Cell Sci, 2001. **114**(Pt 8): p. 1429-30.
- 1186 151. Park, S.H., et al., *Resistance Exercise Training Attenuates the Loss of Endogenous GLP-1*  
1187 *Receptor in the Hypothalamus of Type 2 Diabetic Rats*. Int J Environ Res Public Health, 2019.  
1188 **16**(5).
- 1189 152. Enns, L.C. and W. Ladiges, *Protein kinase A signaling as an anti-aging target*. Ageing Res Rev,  
1190 2010. **9**(3): p. 269-72.
- 1191 153. Chen, C.J., et al., *[Protein Kinase A and Lipid Metabolism]*. Sheng Li Ke Xue Jin Zhan, 2016.  
1192 **47**(5): p. 321-9.
- 1193 154. Sajjan, M.P. and R.V. Farese, *Insulin signalling in hepatocytes of humans with type 2 diabetes:*  
1194 *excessive production and activity of protein kinase C- $\alpha$  (PKC- $\alpha$ ) and dependent processes*  
1195 *and reversal by PKC- $\alpha$  inhibitors*. Diabetologia, 2012. **55**(5): p. 1446-57.
- 1196 155. Sajjan, M.P., et al., *Correction of metabolic abnormalities in a rodent model of obesity,*  
1197 *metabolic syndrome, and type 2 diabetes mellitus by inhibitors of hepatic protein kinase C-*  
1198  *$\alpha$* . Metabolism, 2012. **61**(4): p. 459-69.
- 1199 156. Meier, J.J., *GLP-1 receptor agonists for individualized treatment of type 2 diabetes mellitus*.  
1200 Nat Rev Endocrinol, 2012. **8**(12): p. 728-42.
- 1201 157. Cheng, D., et al., *The Role of Glucagon-Like Peptide-1 Receptor Agonists (GLP-1 RA) in*  
1202 *Diabetes-Related Neurodegenerative Diseases*. Drug Des Devel Ther, 2022. **16**: p. 665-684.
- 1203 158. Yin, W., et al., *Protein kinase C and protein kinase A are involved in the protection of*  
1204 *recombinant human glucagon-like peptide-1 on glomeruli and tubules in diabetic rats*. J  
1205 Diabetes Investig, 2019. **10**(3): p. 613-625.
- 1206 159. Rovira-Llopis, S., et al., *Mitochondrial dynamics in type 2 diabetes: Pathophysiological*  
1207 *implications*. Redox Biol, 2017. **11**: p. 637-645.
- 1208 160. Wada, J. and A. Nakatsuka, *Mitochondrial Dynamics and Mitochondrial Dysfunction in*  
1209 *Diabetes*. Acta Med Okayama, 2016. **70**(3): p. 151-8.
- 1210 161. Luo, J.S., et al., *The Role of Mitochondrial Quality Control in Cognitive Dysfunction in*  
1211 *Diabetes*. Neurochem Res, 2022. **47**(8): p. 2158-2172.
- 1212 162. Cheng, H., et al., *Mitochondrial dysfunction plays a key role in the development of*  
1213 *neurodegenerative diseases in diabetes*. Am J Physiol Endocrinol Metab, 2020. **318**(5): p.  
1214 E750-E764.
- 1215 163. Gusdon, A.M., et al., *Exercise increases mitochondrial complex I activity and DRP1 expression*  
1216 *in the brains of aged mice*. Exp Gerontol, 2017. **90**: p. 1-13.
- 1217 164. Amar, D., et al., *The mitochondrial multi-omic response to exercise training across tissues*.  
1218 bioRxiv, 2023.
- 1219 165. Mendham, A.E., et al., *Exercise training improves mitochondrial respiration and is associated*  
1220 *with an altered intramuscular phospholipid signature in women with obesity*. Diabetologia,  
1221 2021. **64**(7): p. 1642-1659.
- 1222 166. Meex, R.C., et al., *Restoration of muscle mitochondrial function and metabolic flexibility in*  
1223 *type 2 diabetes by exercise training is paralleled by increased myocellular fat storage and*  
1224 *improved insulin sensitivity*. Diabetes, 2010. **59**(3): p. 572-9.
- 1225 167. Hey-Mogensen, M., et al., *Effect of physical training on mitochondrial respiration and*  
1226 *reactive oxygen species release in skeletal muscle in patients with obesity and type 2*  
1227 *diabetes*. Diabetologia, 2010. **53**(9): p. 1976-85.
- 1228 168. Toledo, F.G., et al., *Effects of physical activity and weight loss on skeletal muscle*  
1229 *mitochondria and relationship with glucose control in type 2 diabetes*. Diabetes, 2007. **56**(8):  
1230 p. 2142-7.

- 1231 169. Baekkerud, F.H., et al., *High Intensity Interval Training Ameliorates Mitochondrial Dysfunction*  
1232 *in the Left Ventricle of Mice with Type 2 Diabetes*. *Cardiovasc Toxicol*, 2019. **19**(5): p. 422-  
1233 431.
- 1234 170. Ruegsegger, G.N., et al., *Exercise and metformin counteract altered mitochondrial function in*  
1235 *the insulin-resistant brain*. *JCI Insight*, 2019. **4**(18).
- 1236 171. American College of Sports, M., et al., *American College of Sports Medicine position stand.*  
1237 *Exercise and physical activity for older adults*. *Med Sci Sports Exerc*, 2009. **41**(7): p. 1510-30.
- 1238 172. Cassilhas, R.C., et al., *The impact of resistance exercise on the cognitive function of the*  
1239 *elderly*. *Med Sci Sports Exerc*, 2007. **39**(8): p. 1401-7.
- 1240 173. Murman, D.L., *The Impact of Age on Cognition*. *Semin Hear*, 2015. **36**(3): p. 111-21.
- 1241 174. Peel, C. and K.A. Mossberg, *Effects of cardiovascular medications on exercise responses*. *Phys*  
1242 *Ther*, 1995. **75**(5): p. 387-96.
- 1243 175. Powles, A.C., *The effect of drugs on the cardiovascular response to exercise*. *Med Sci Sports*  
1244 *Exerc*, 1981. **13**(4): p. 252-8.
- 1245
